# Supplementary figures and images for: 5-Aryl-2-(naphtha-1-yl)sulfonamido-thiazol-4(5H)-ones as clathrin inhibitors
Source: Royal Society of Chemistry journal article supplement (doi:10.1039/c6ob02308h), 2016-01-01

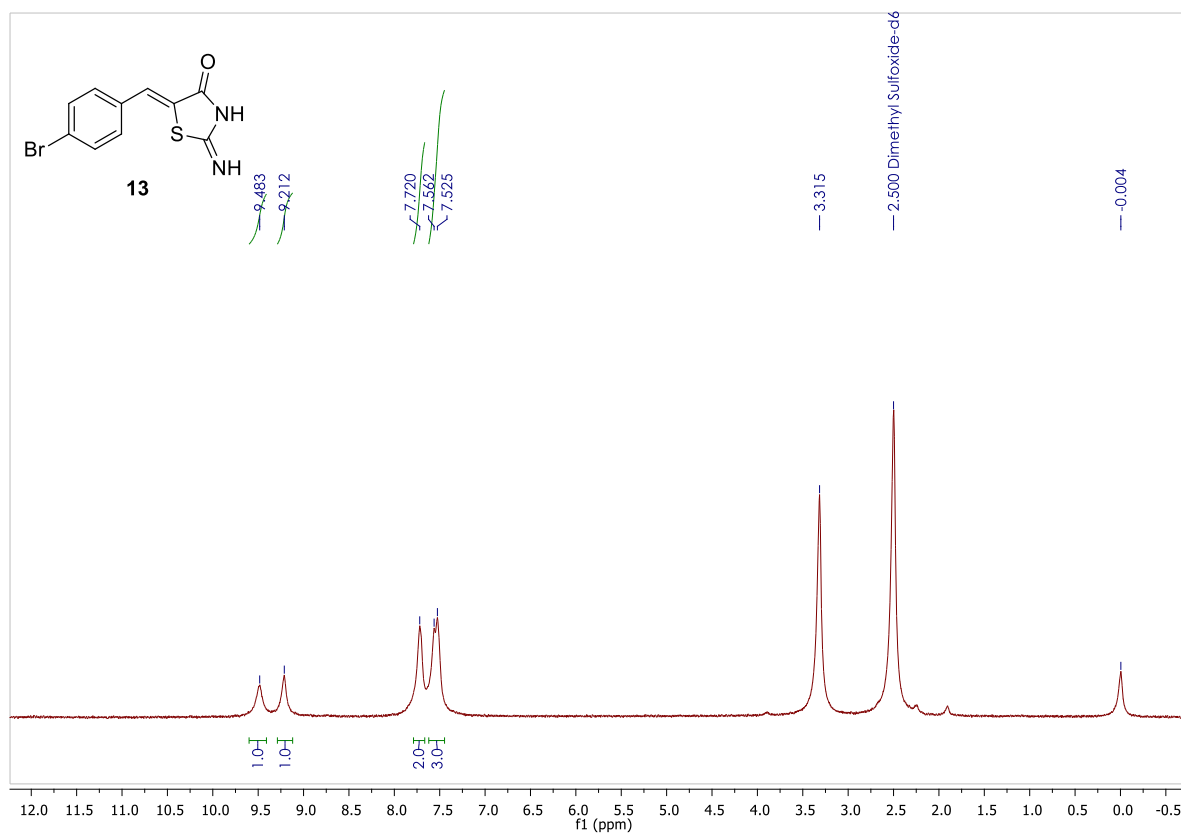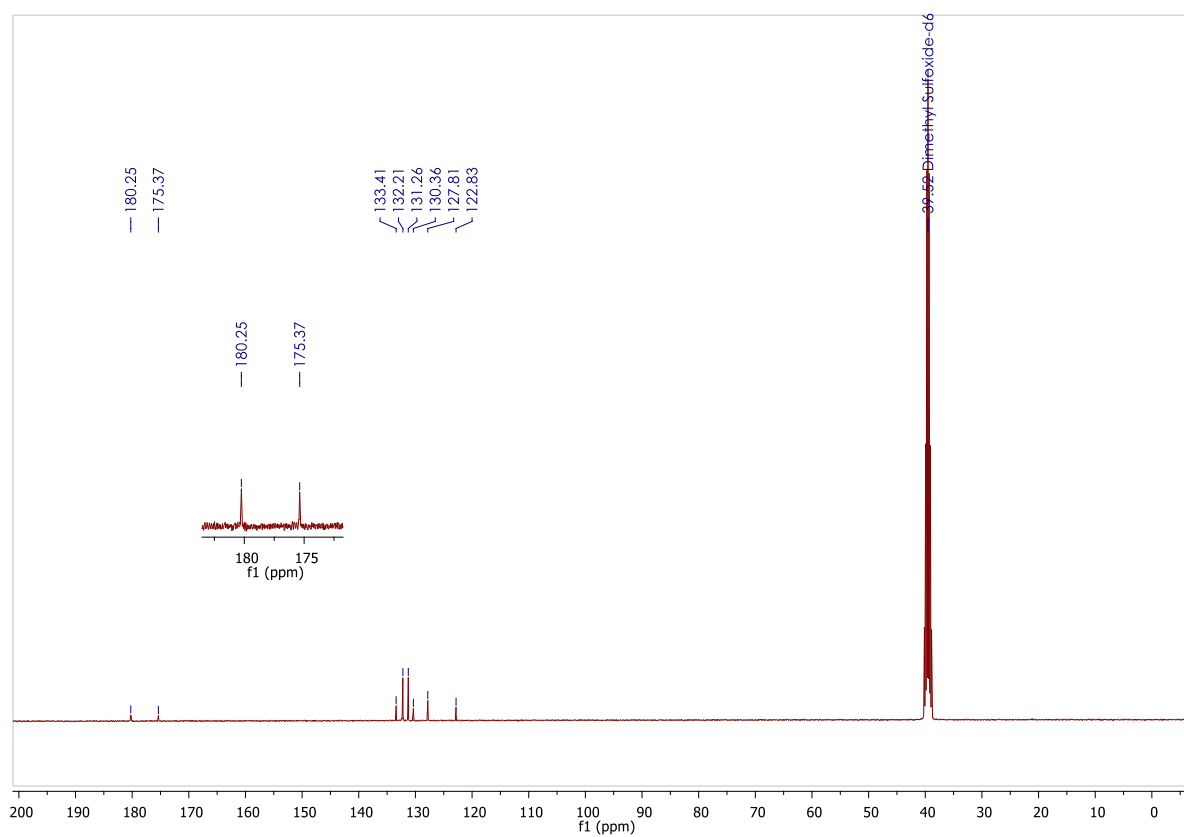

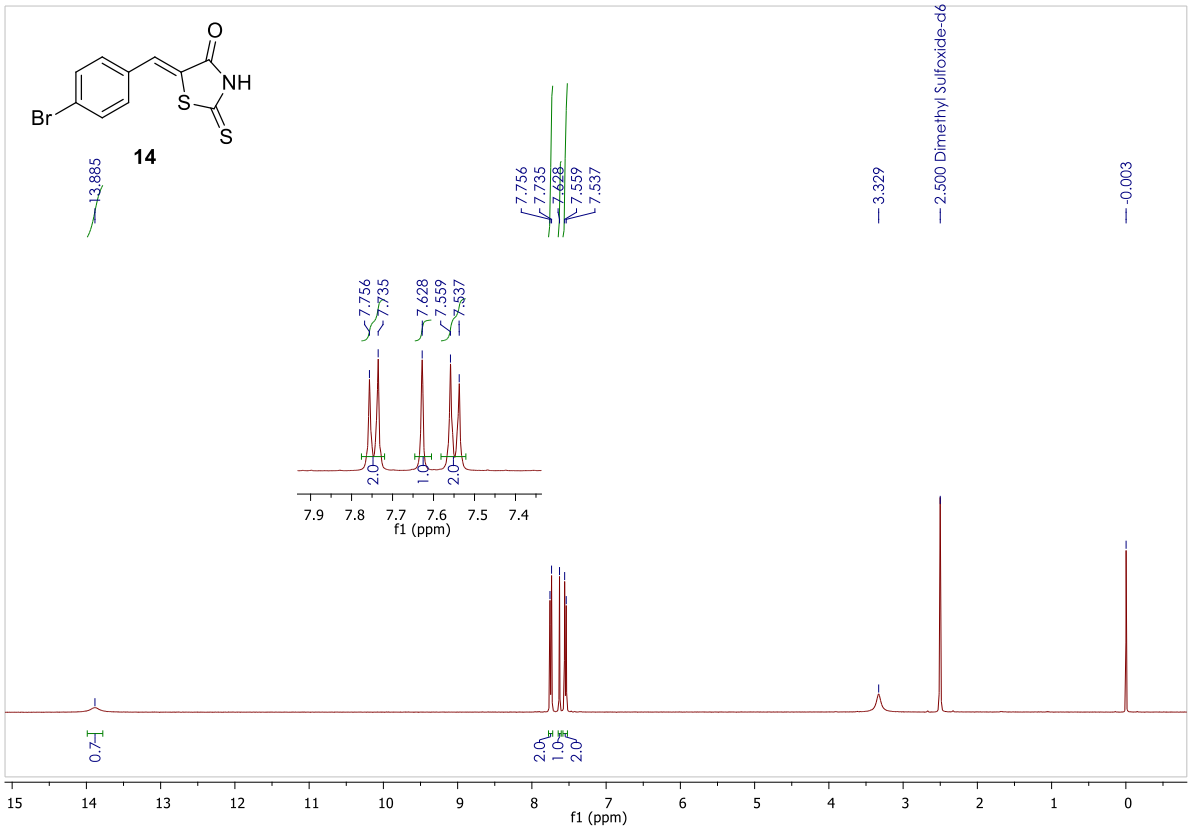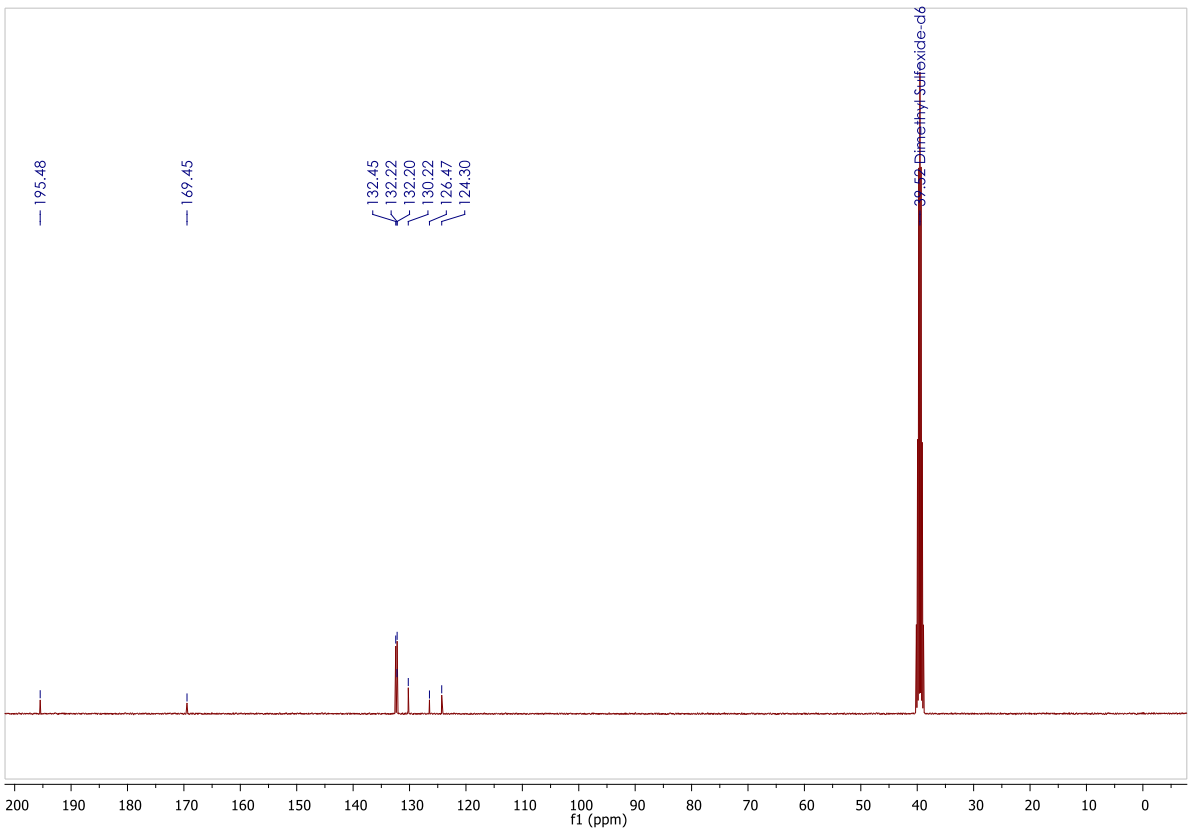

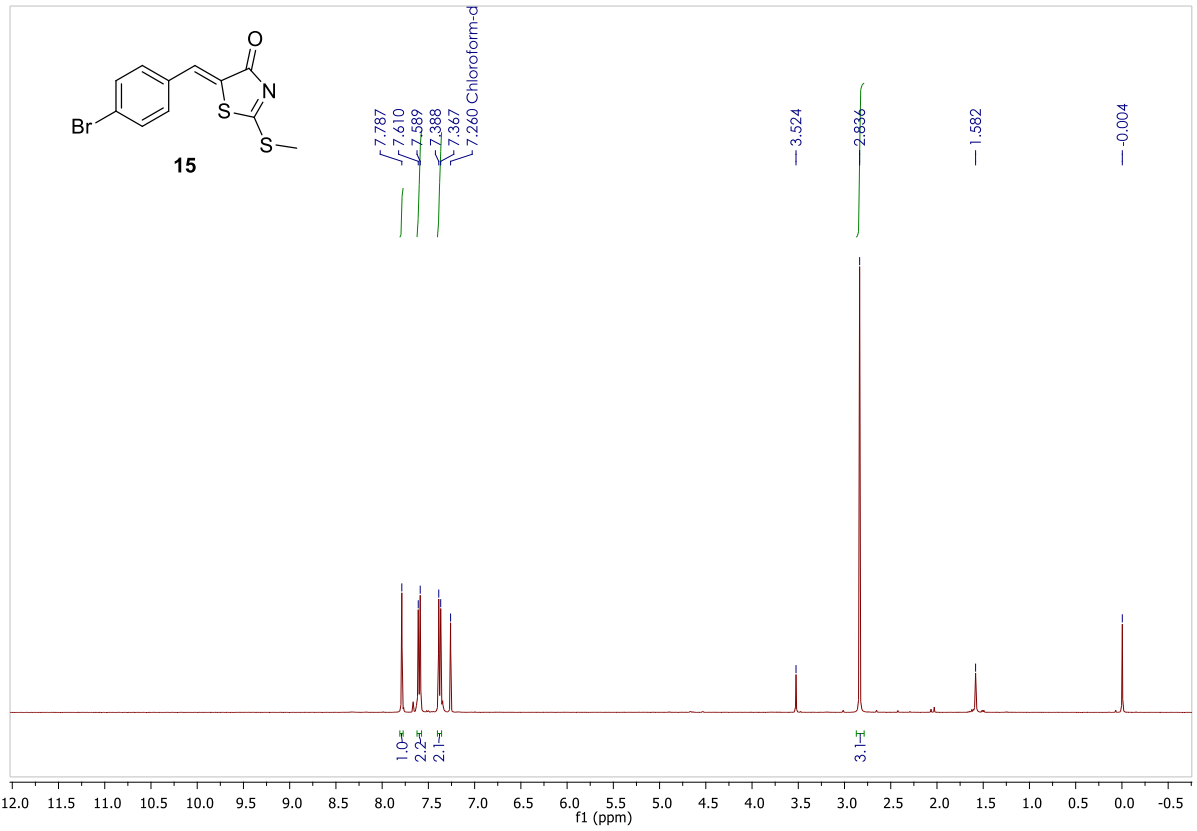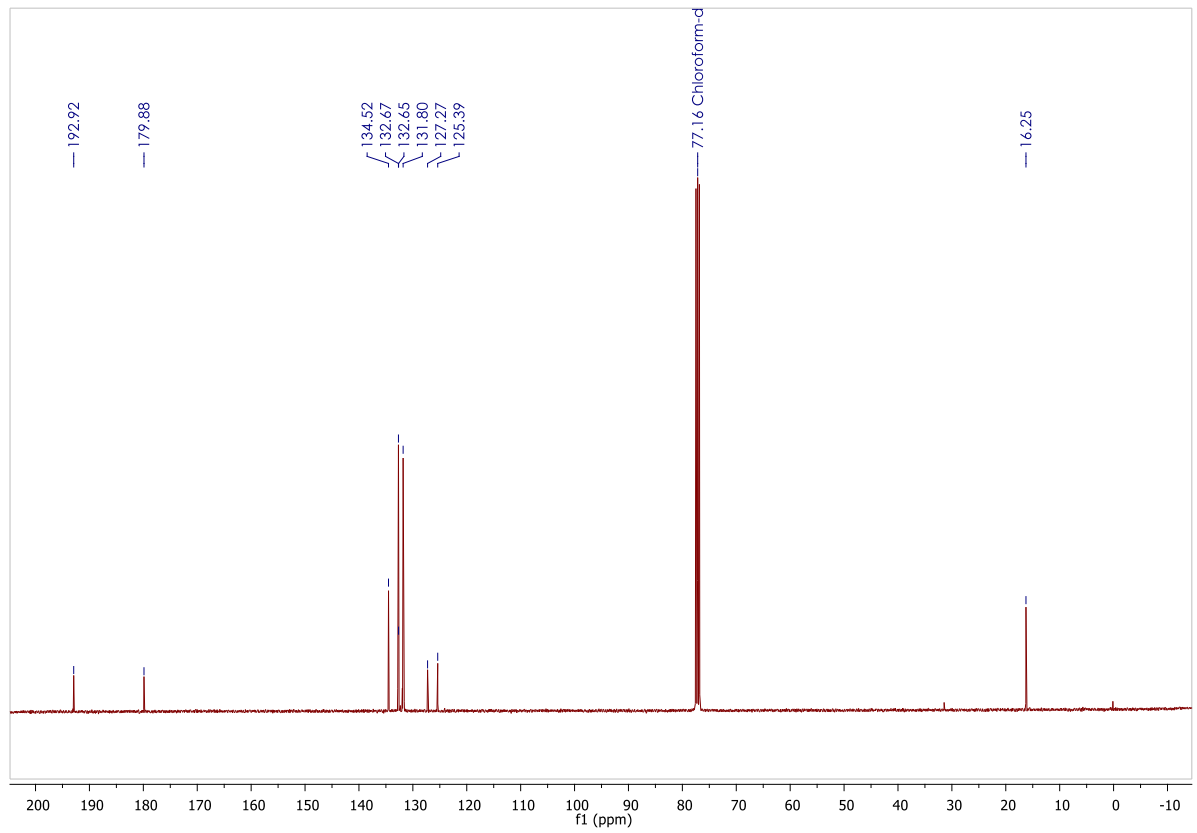

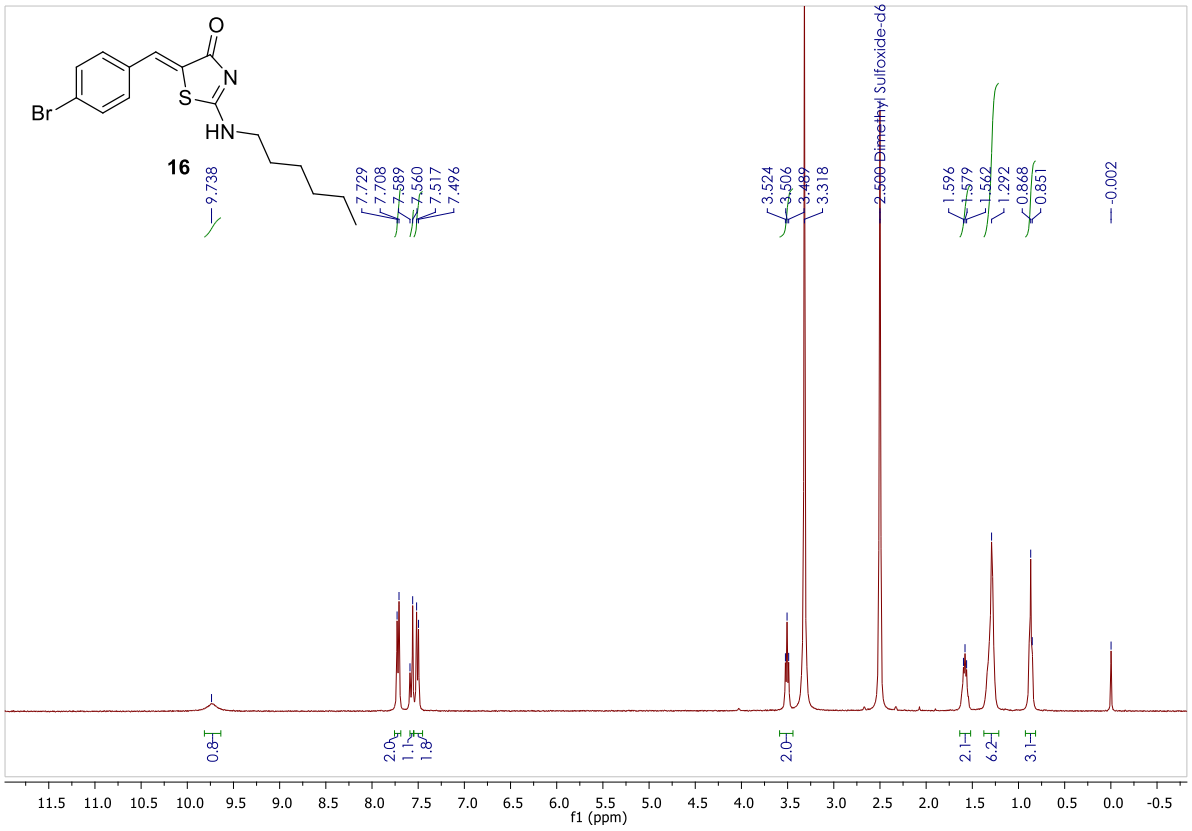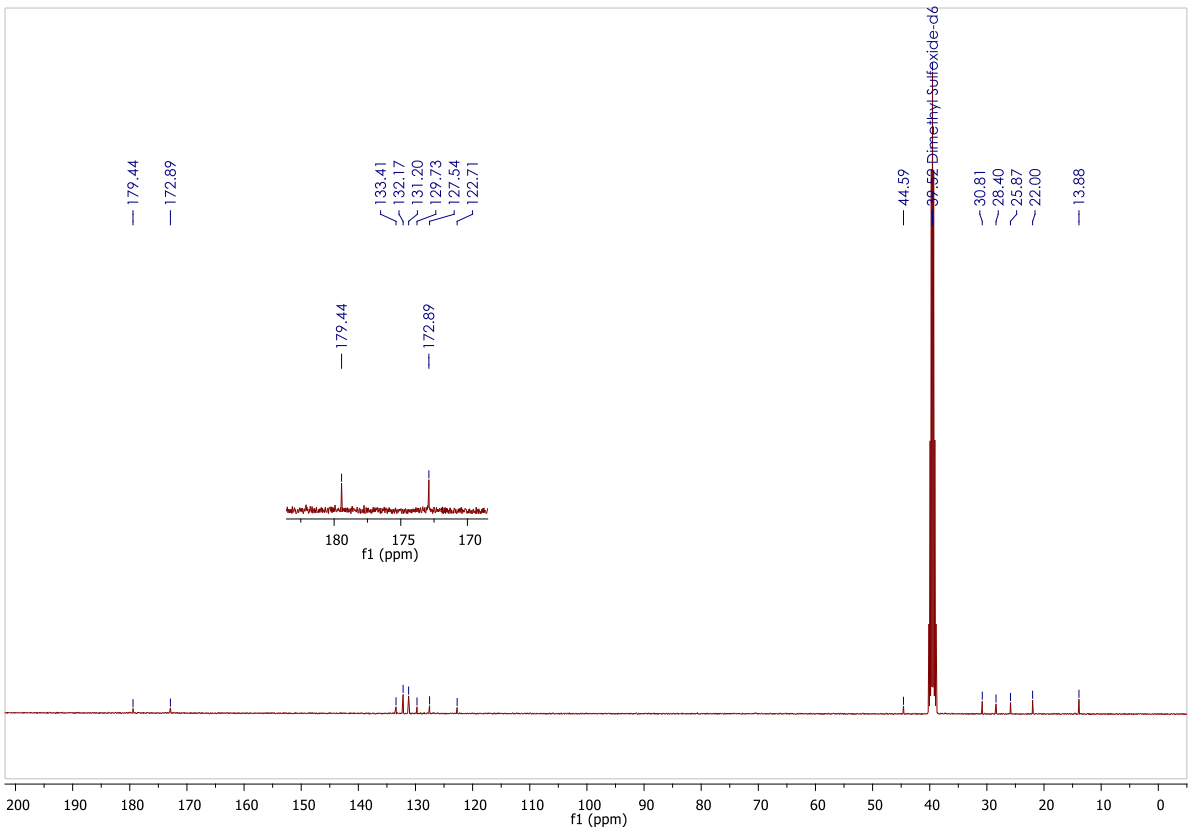

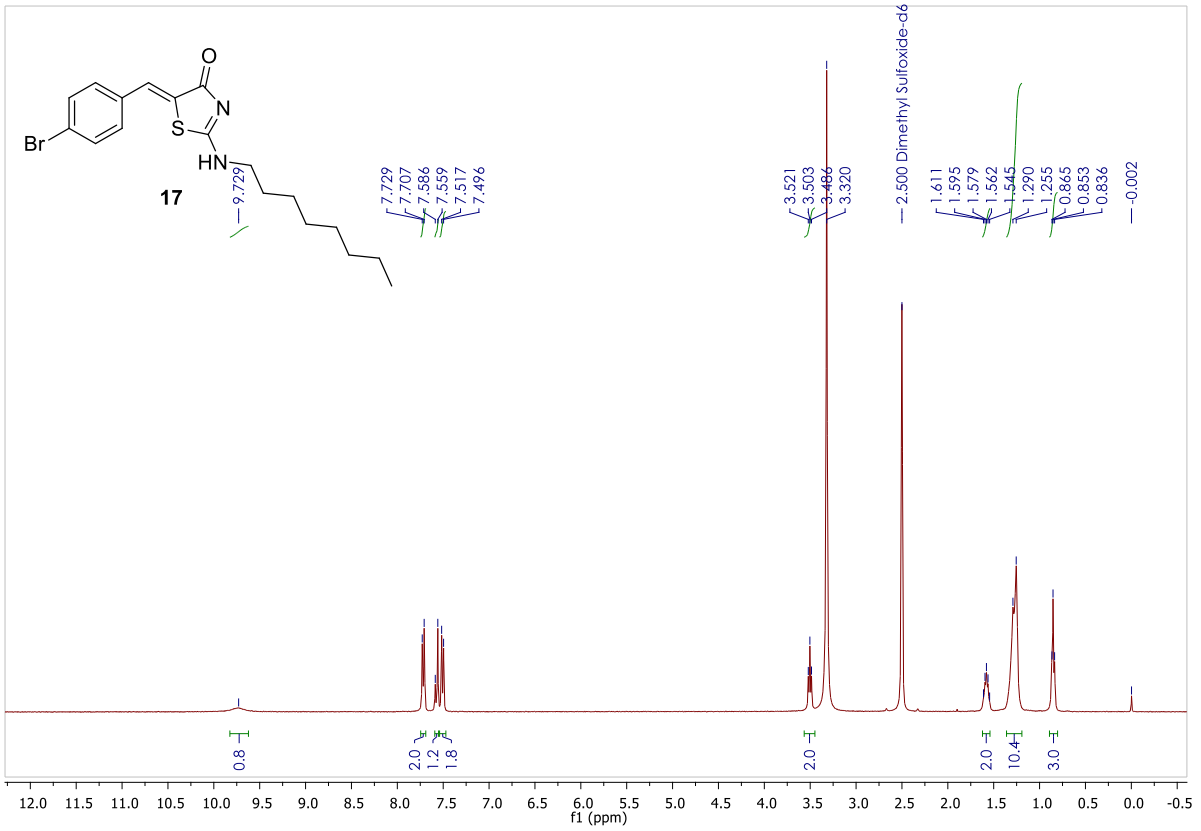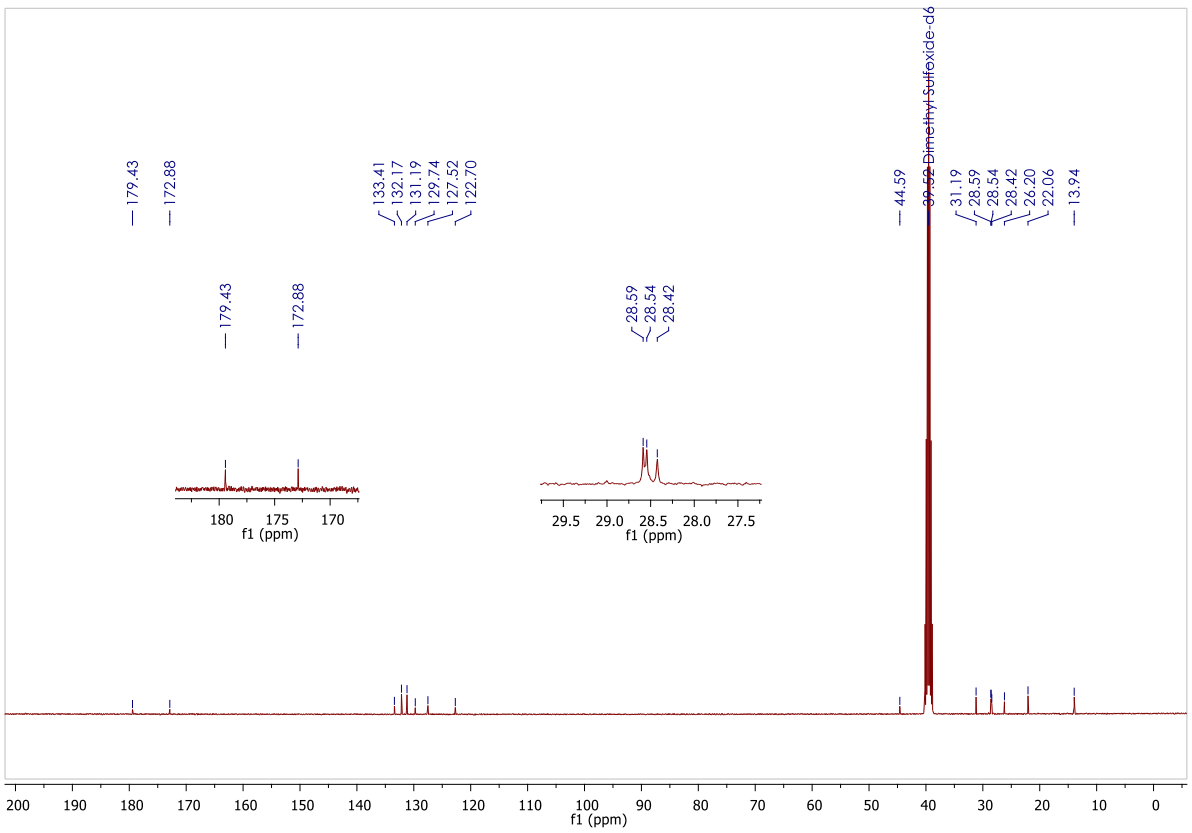

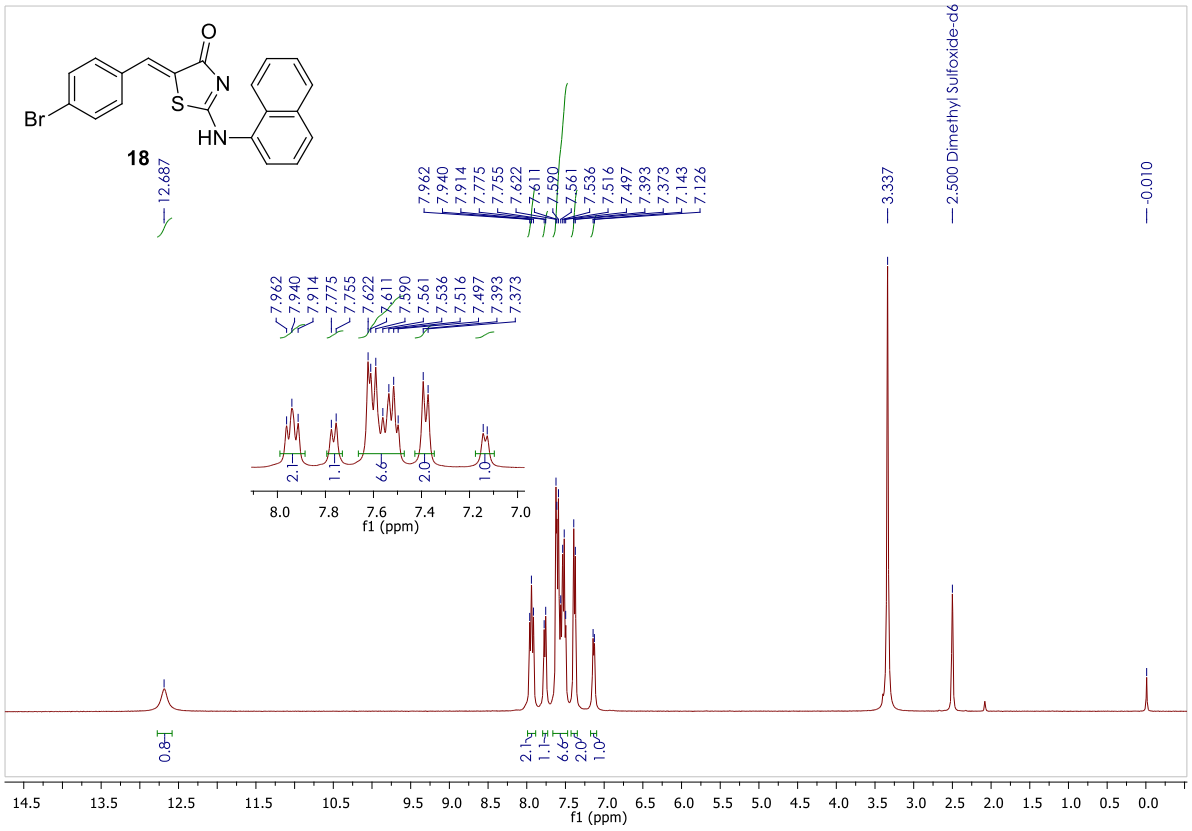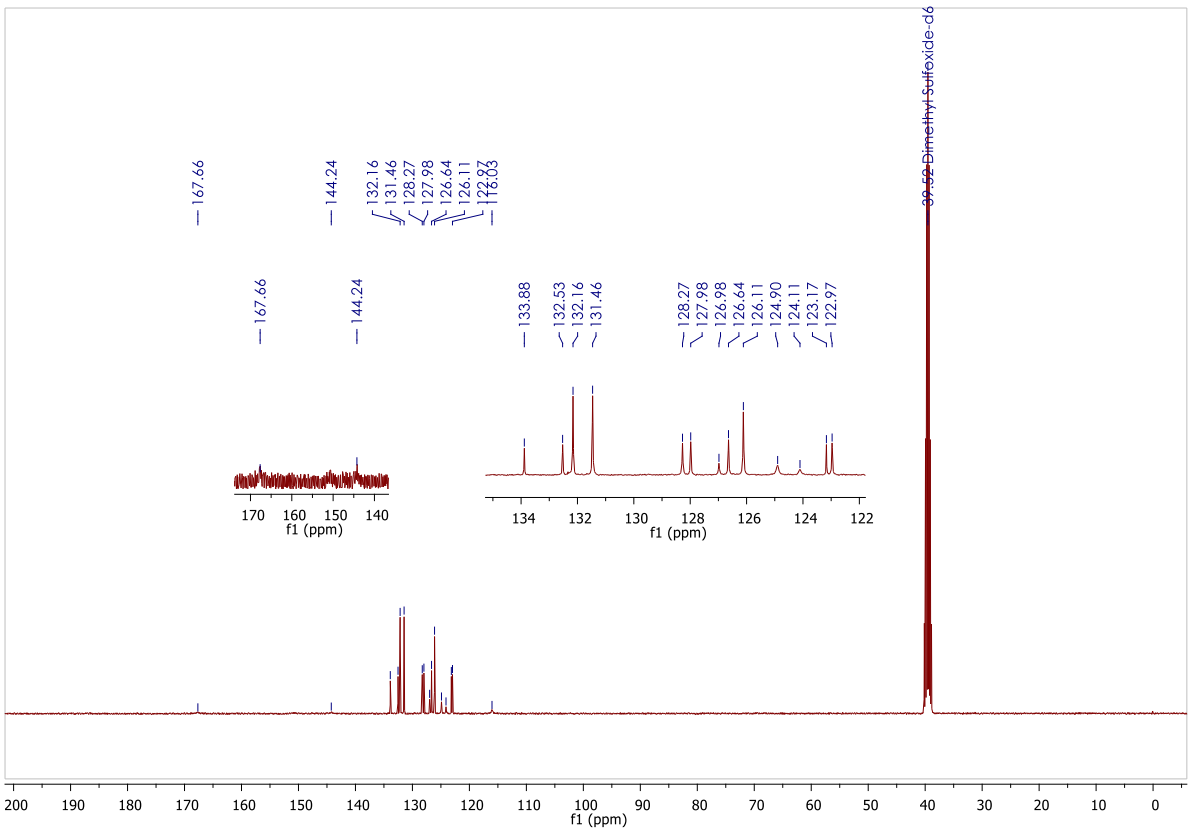

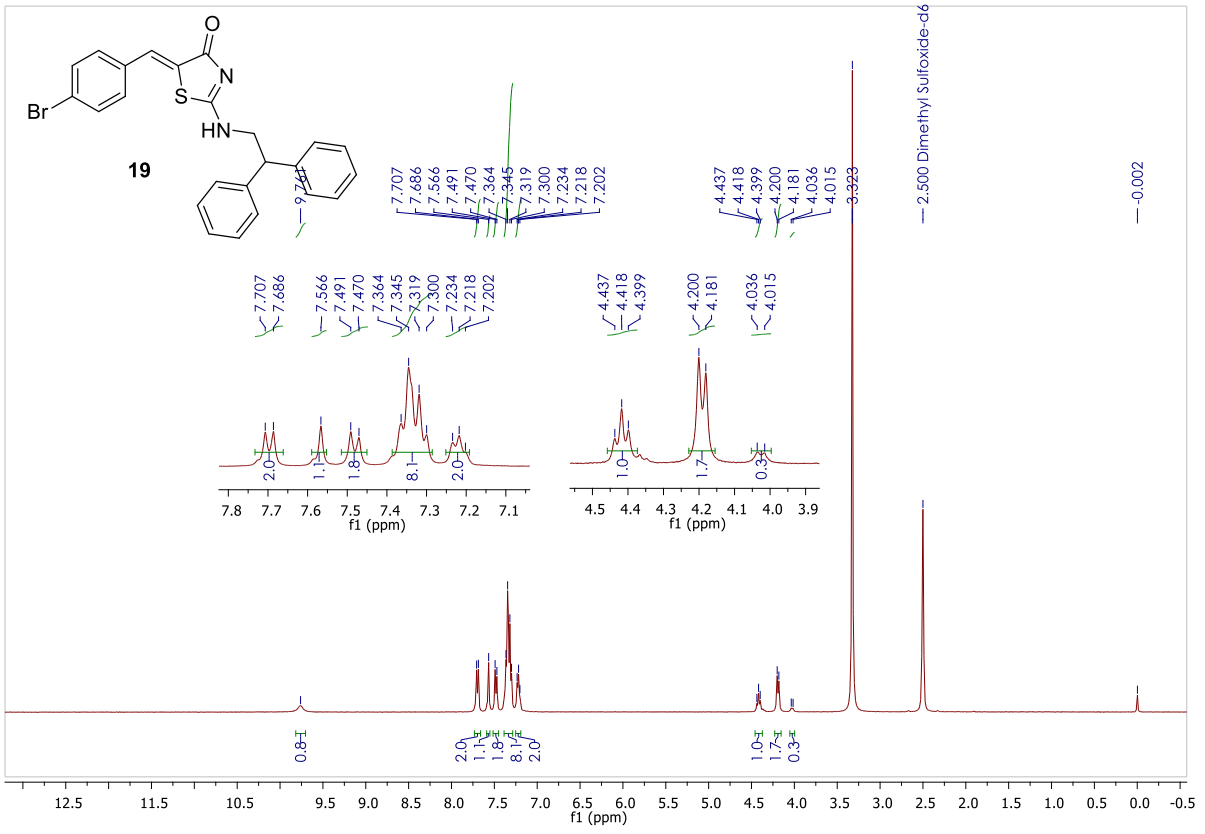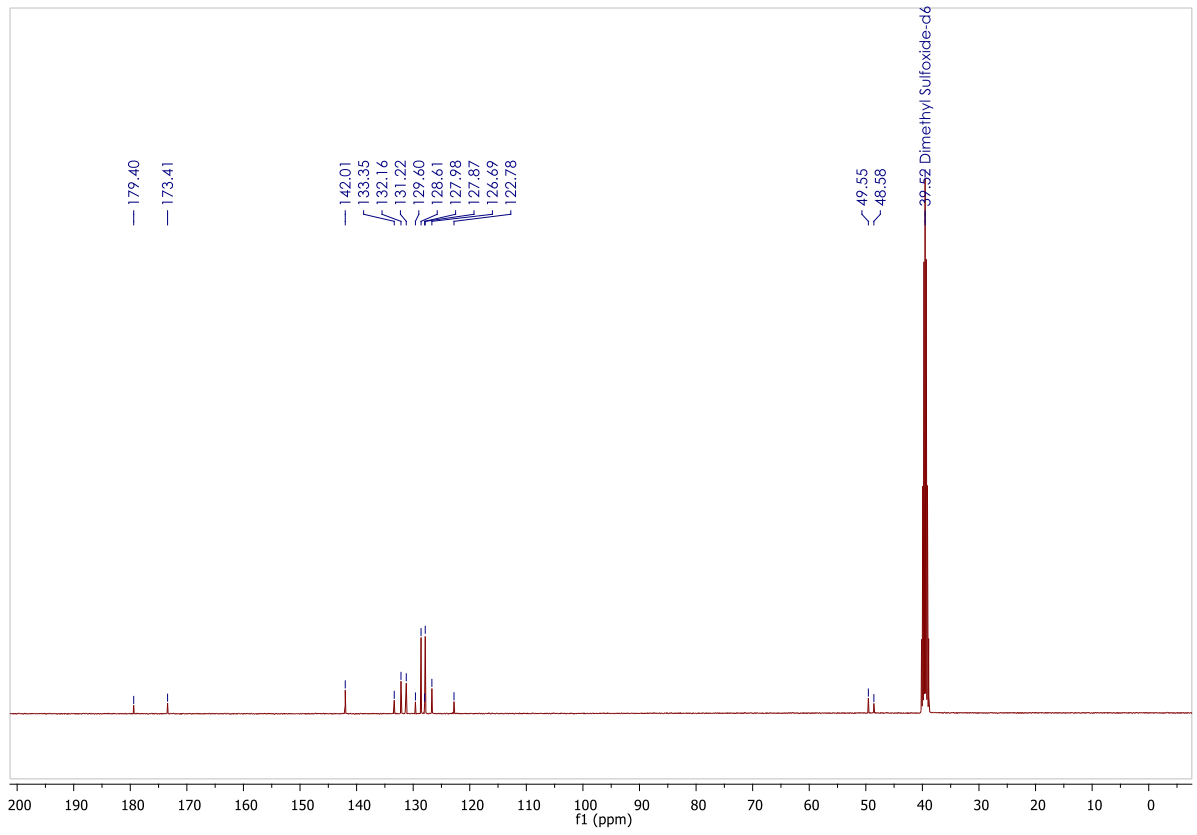

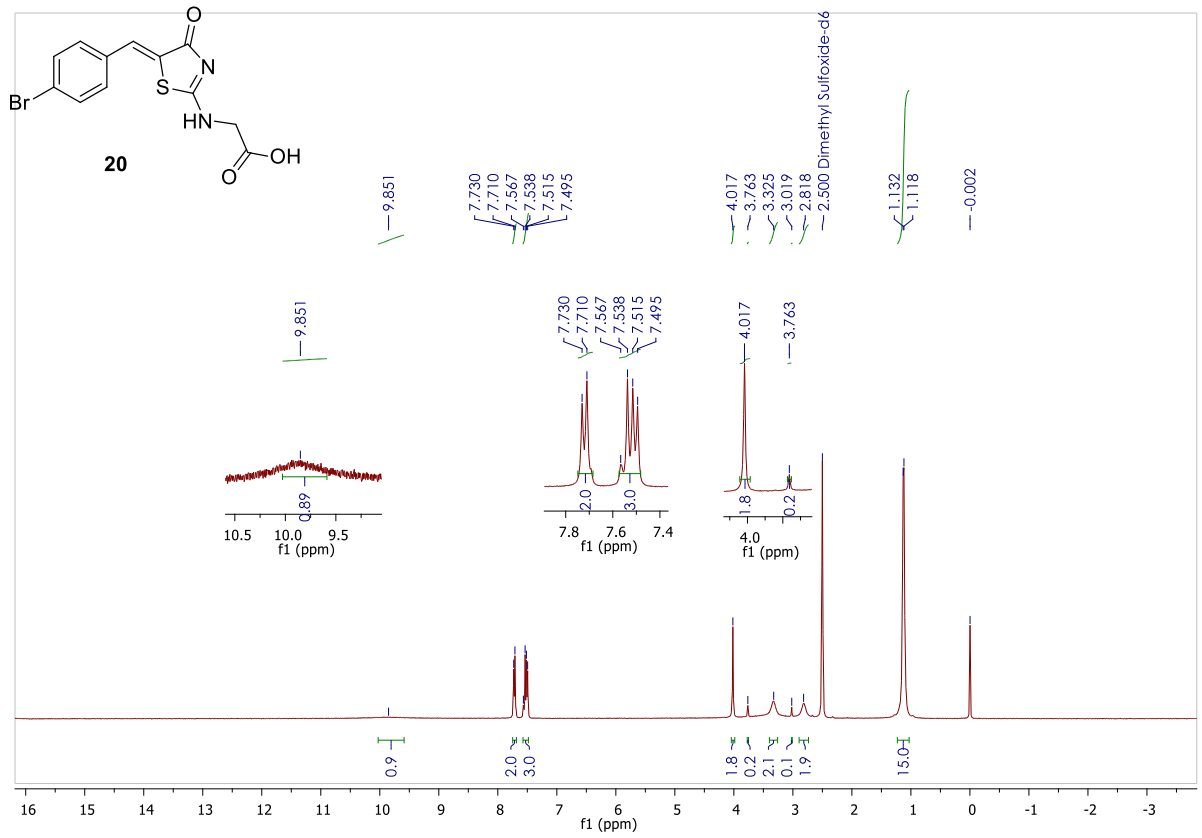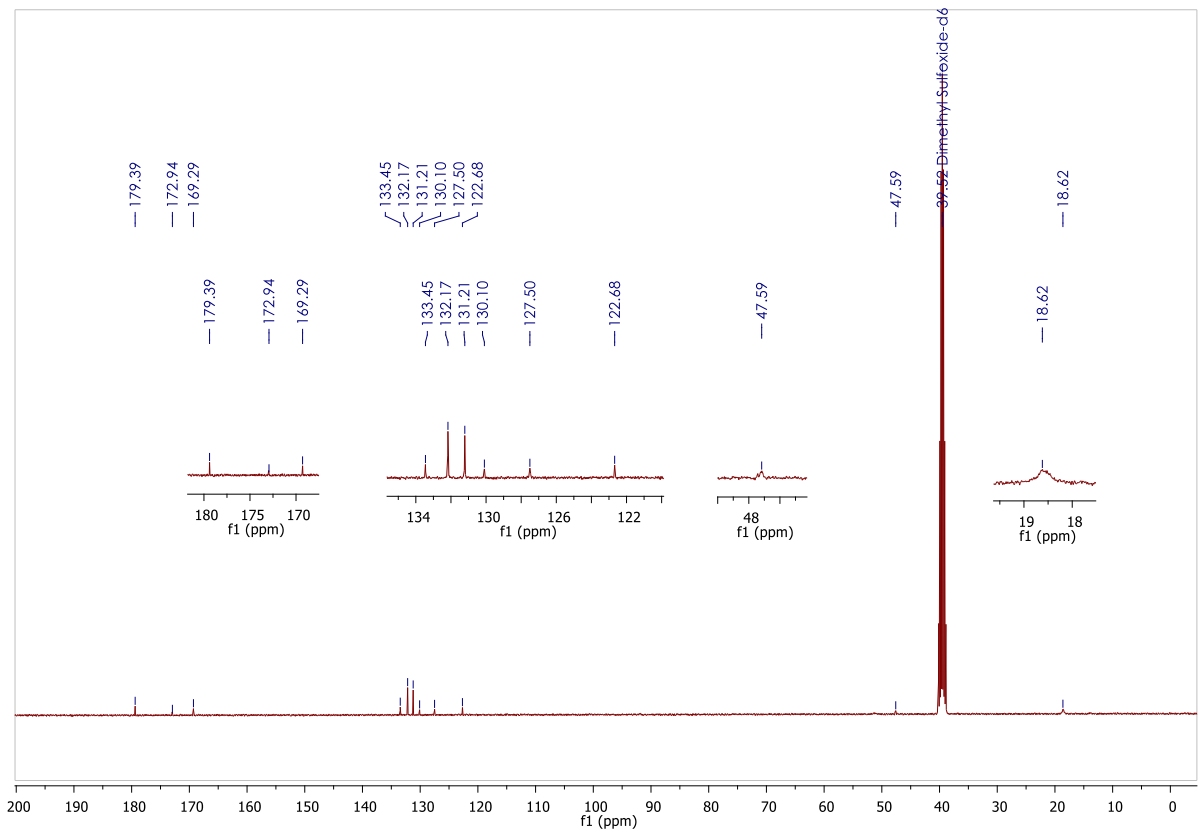



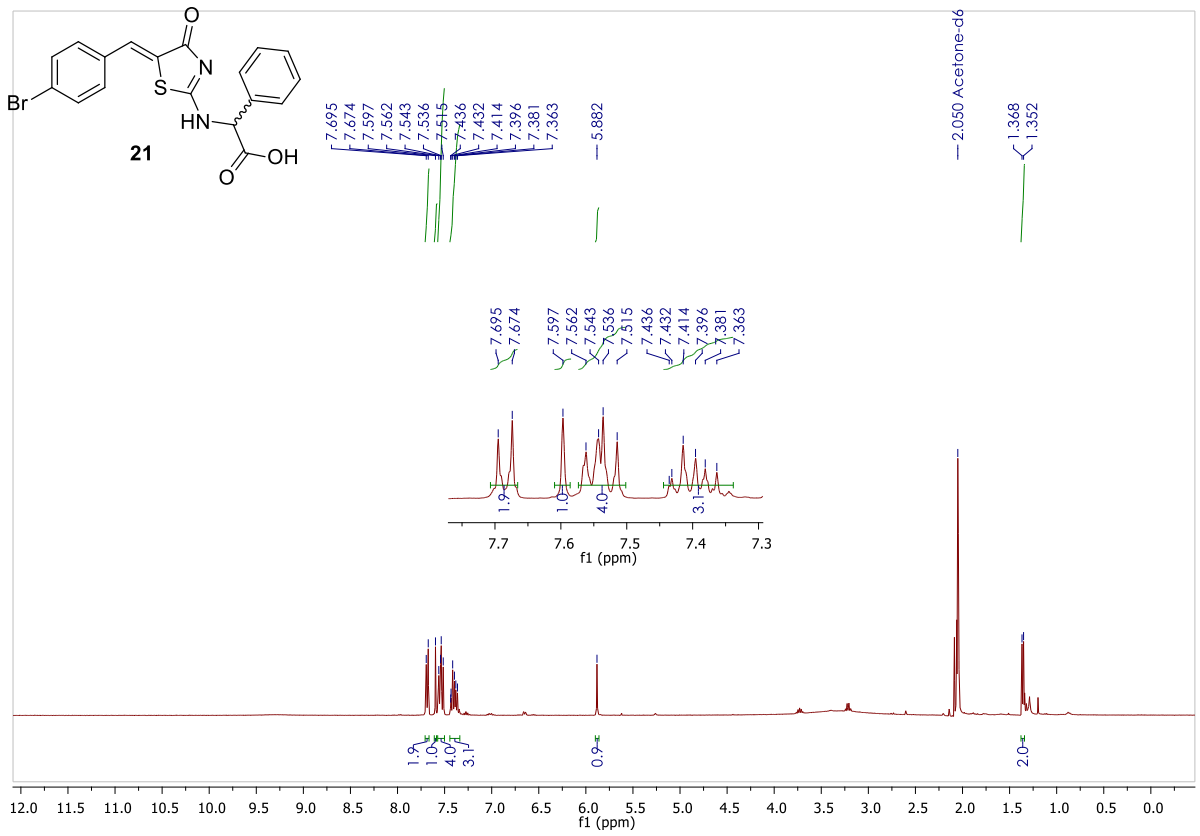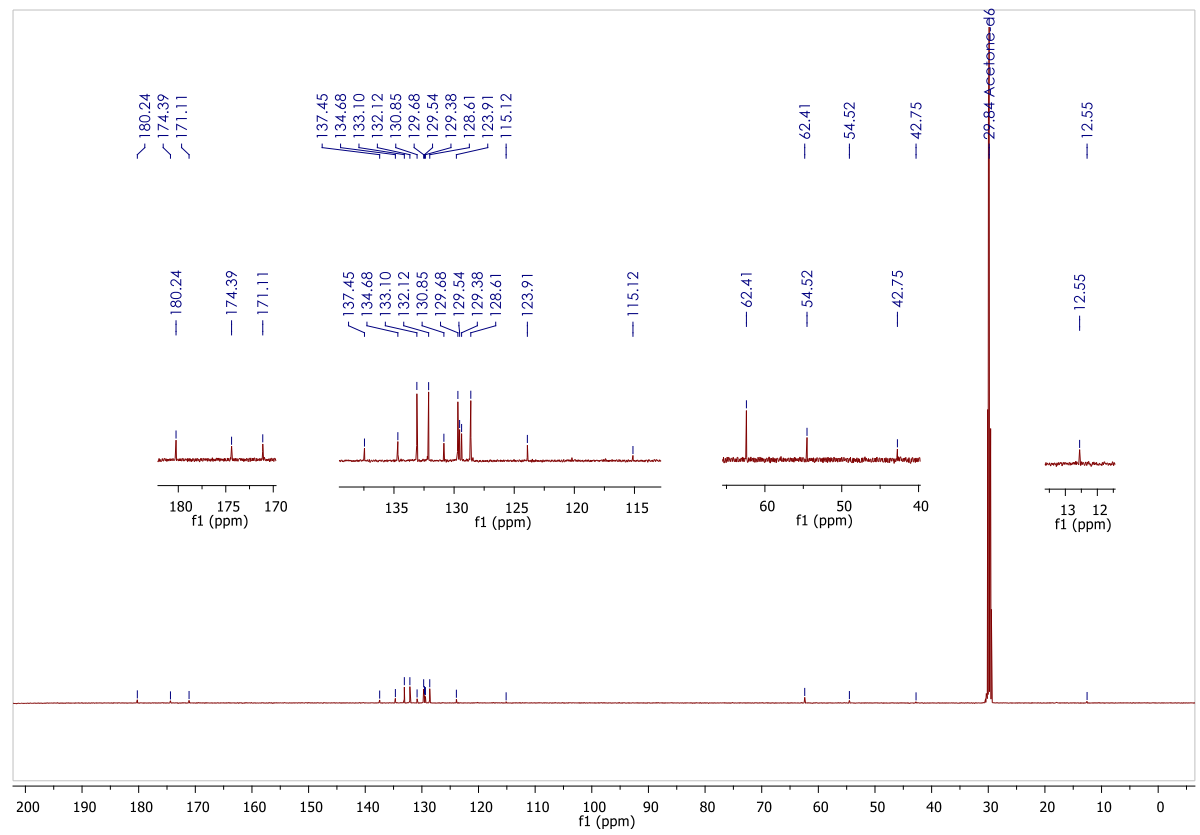

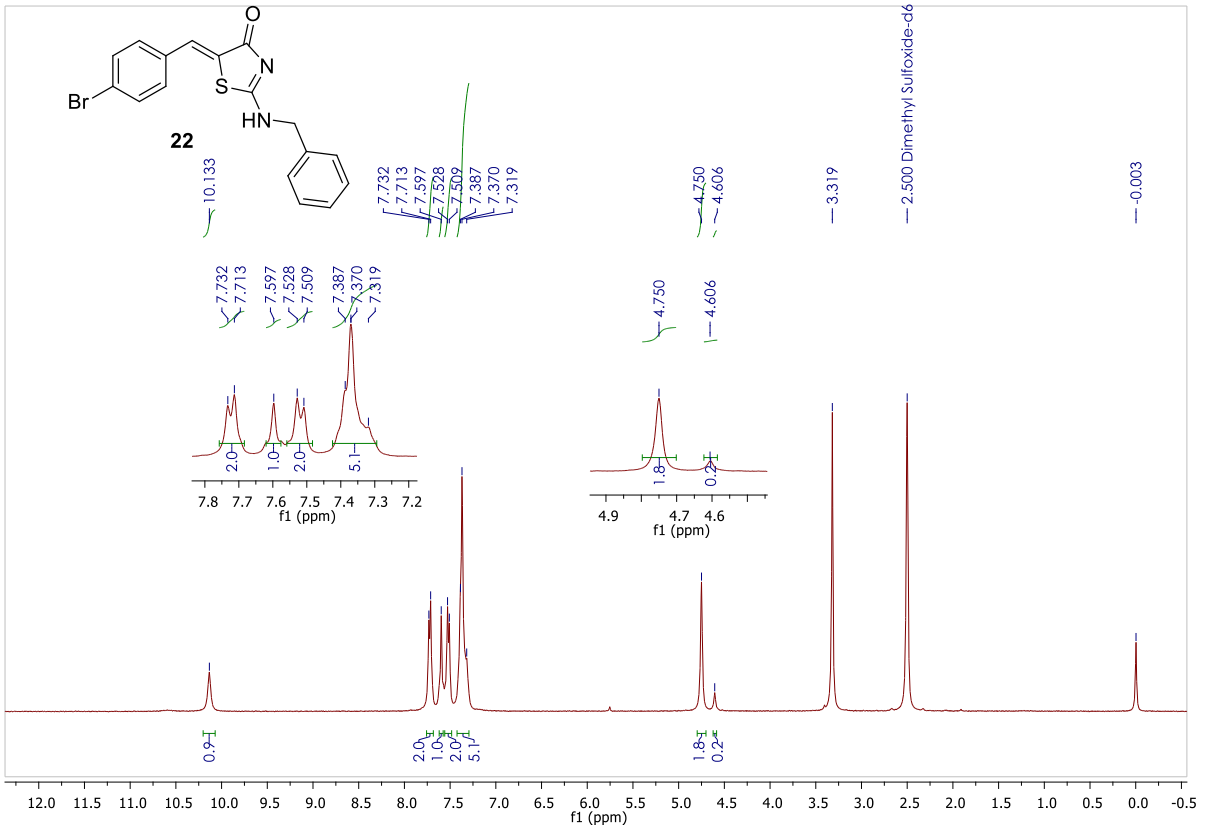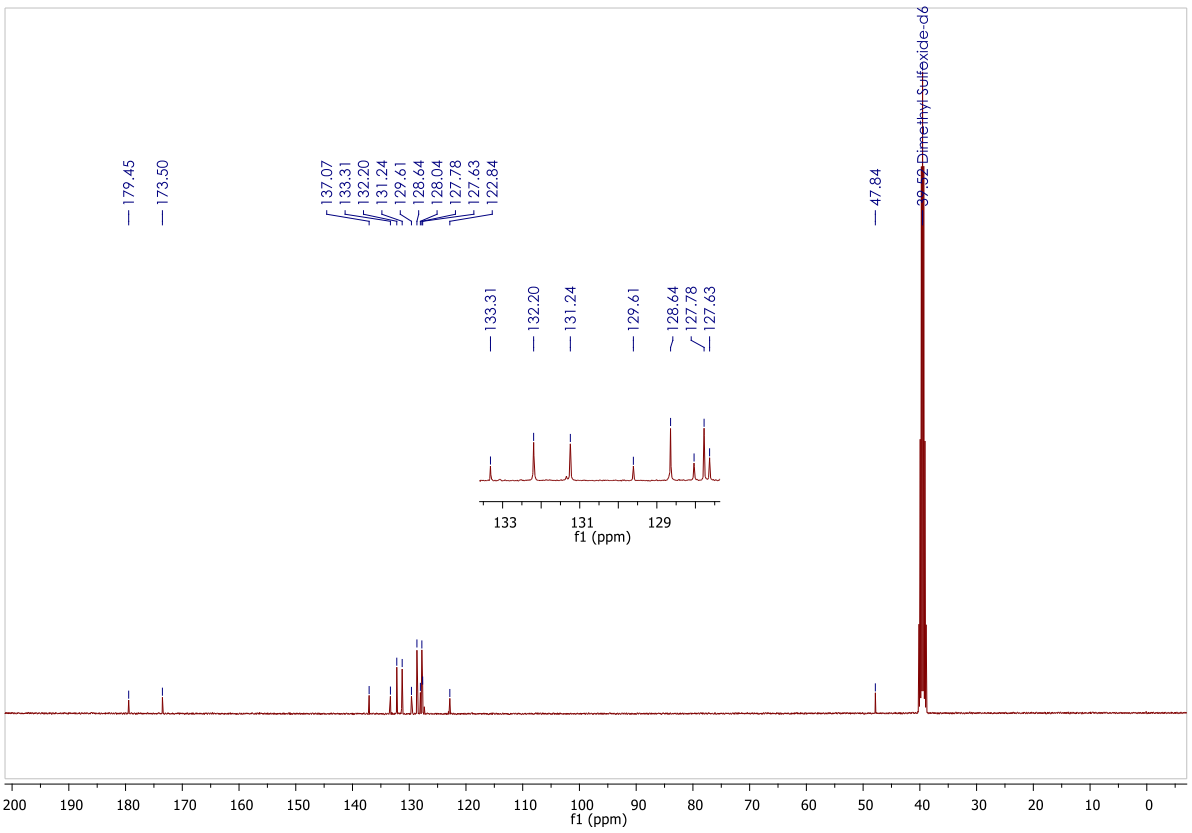

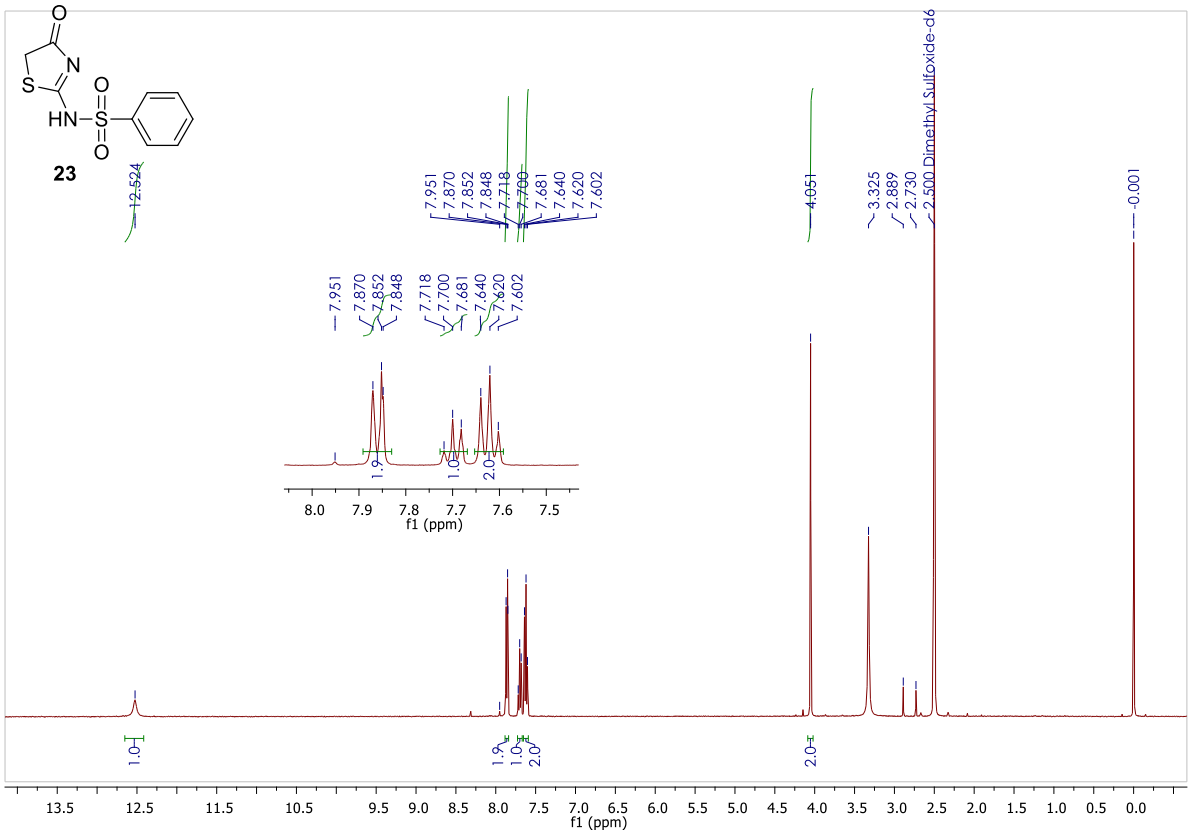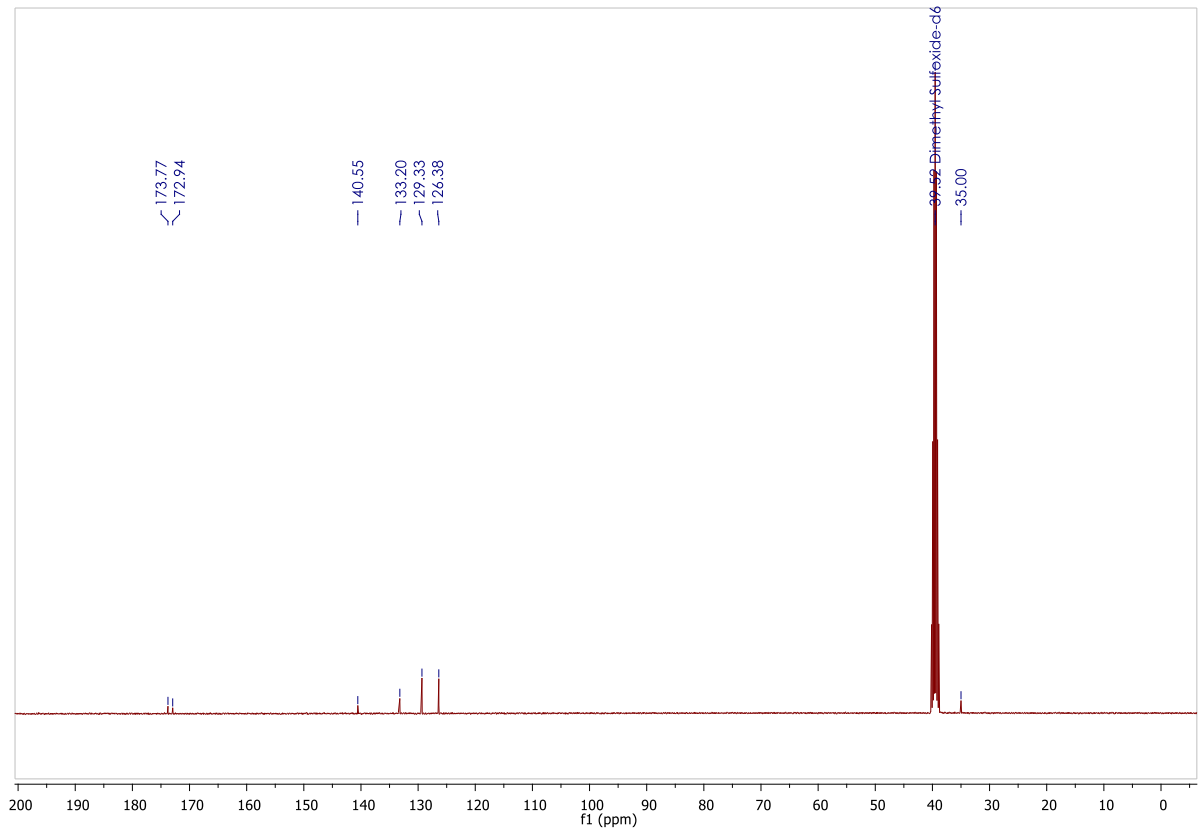

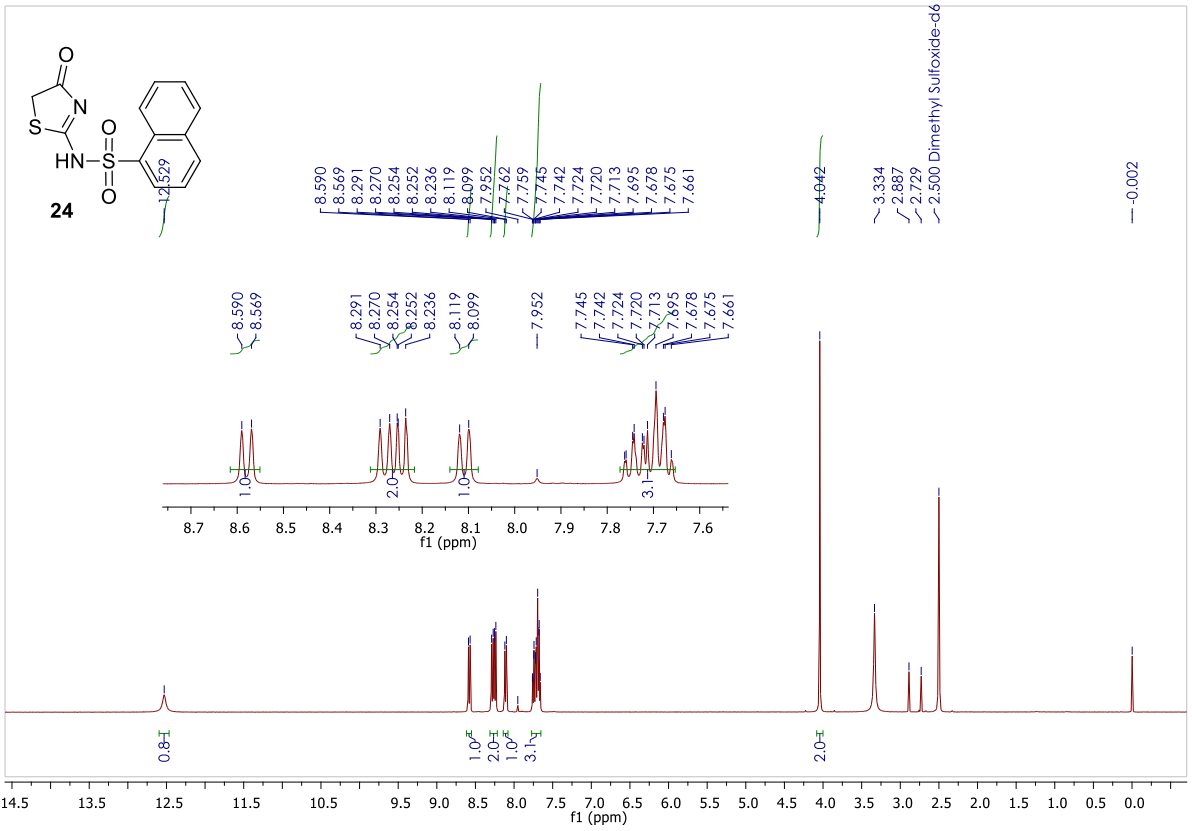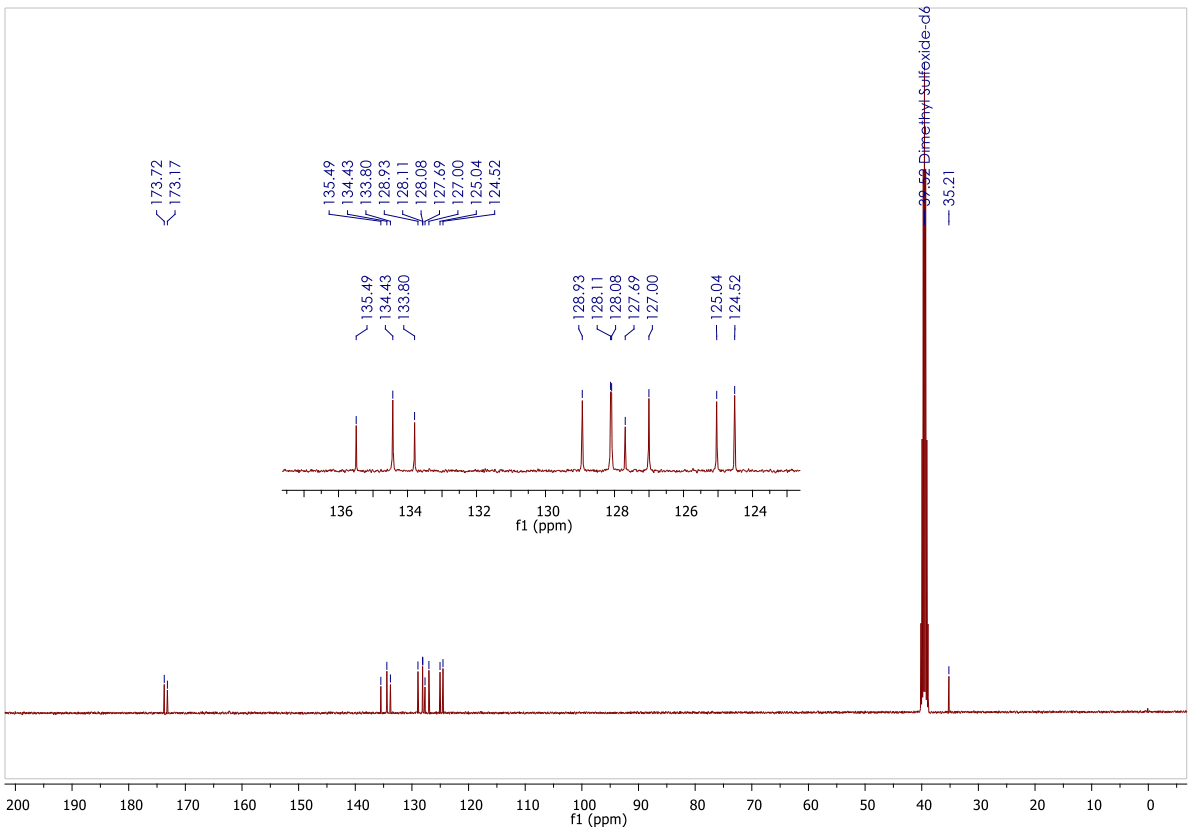

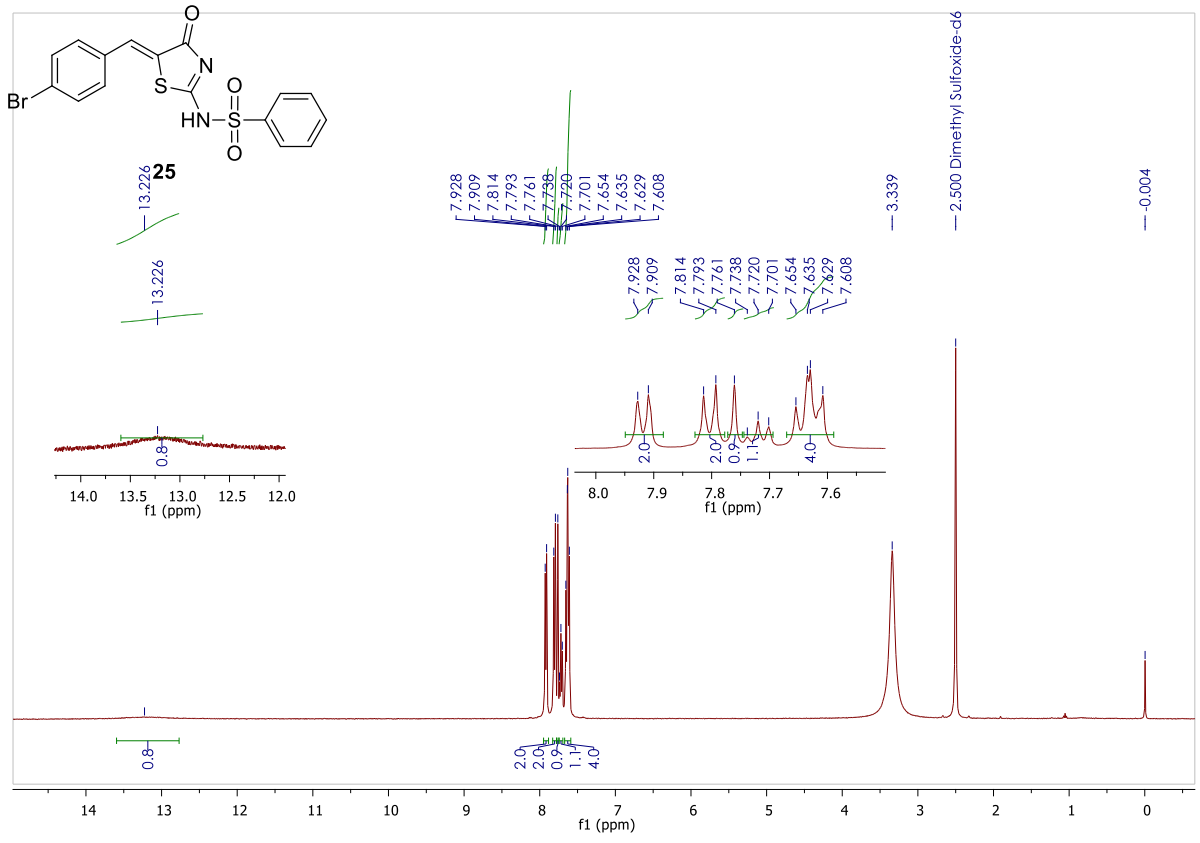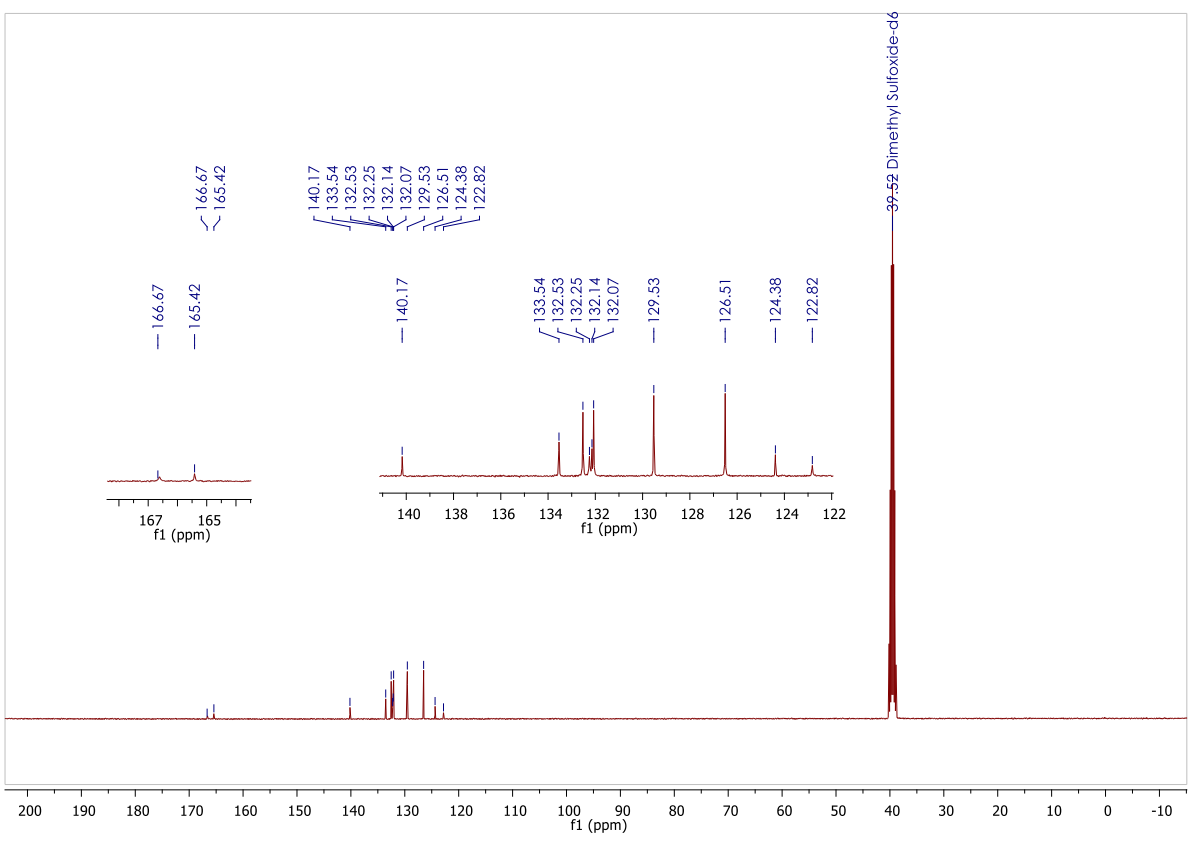

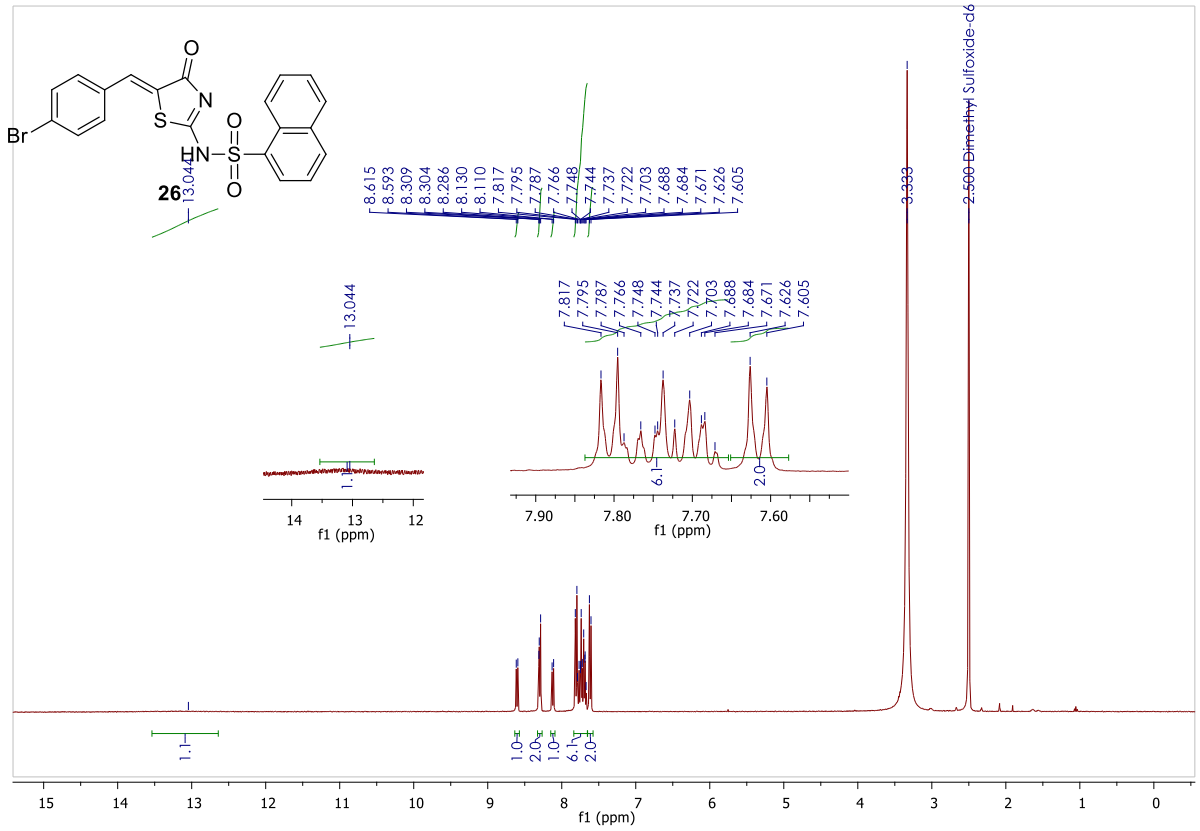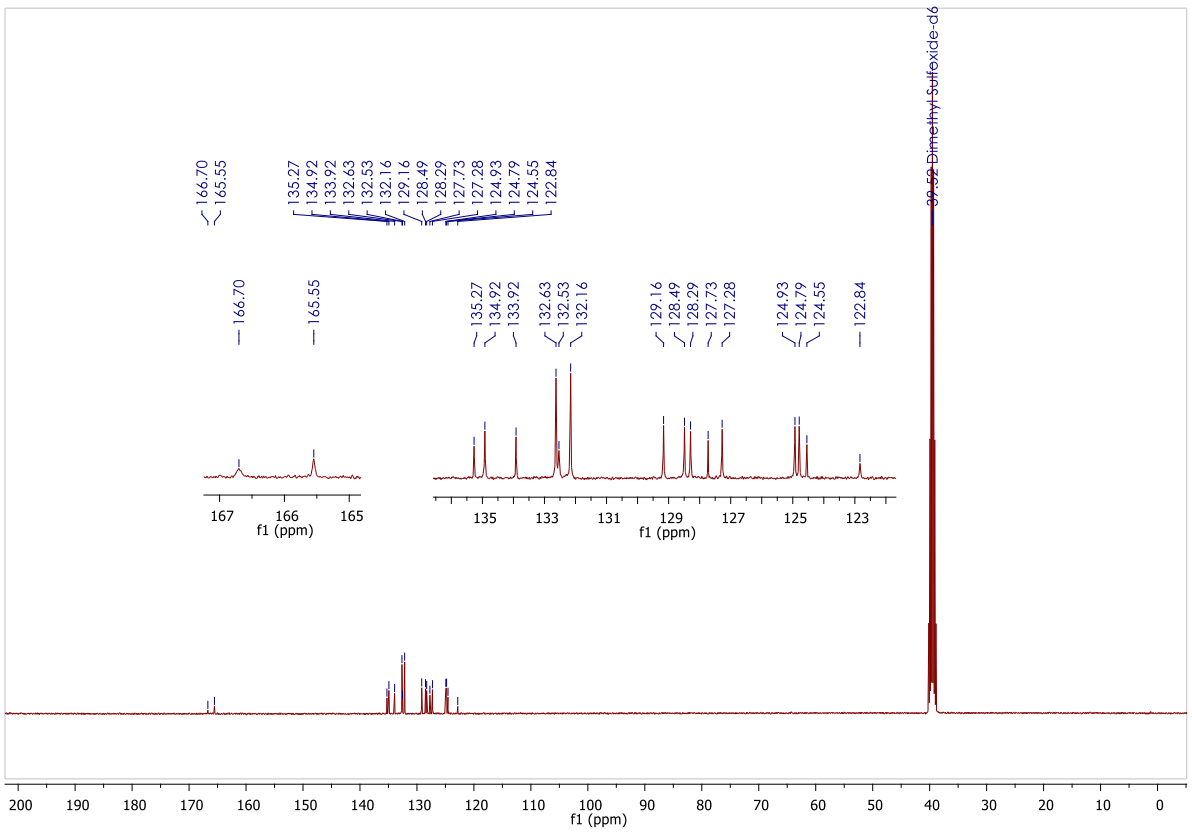

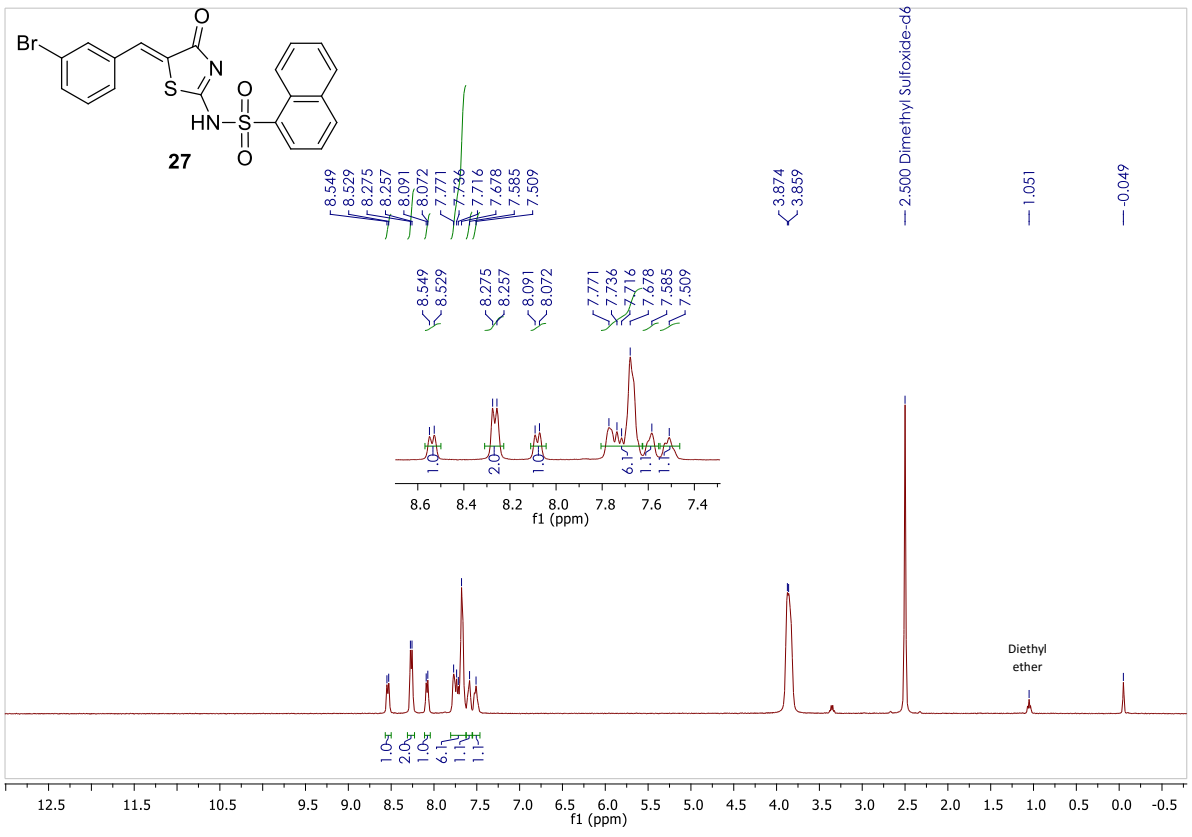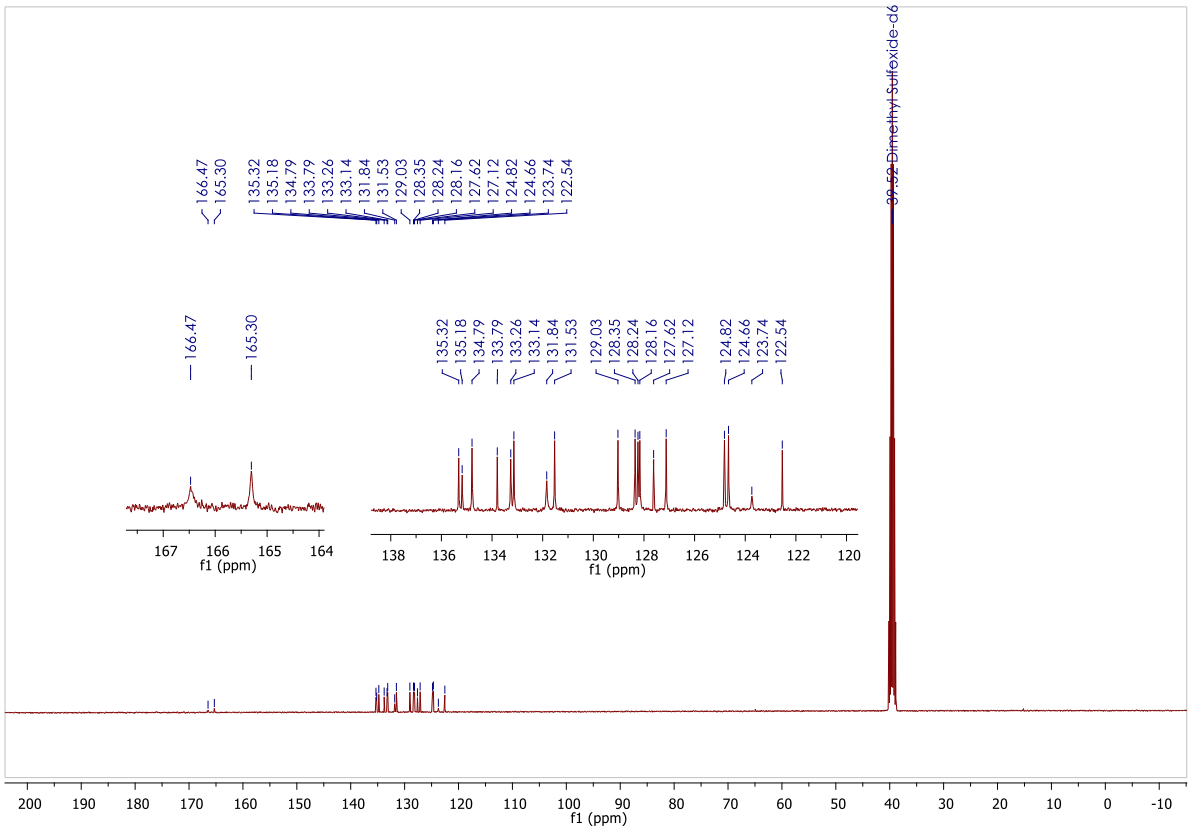

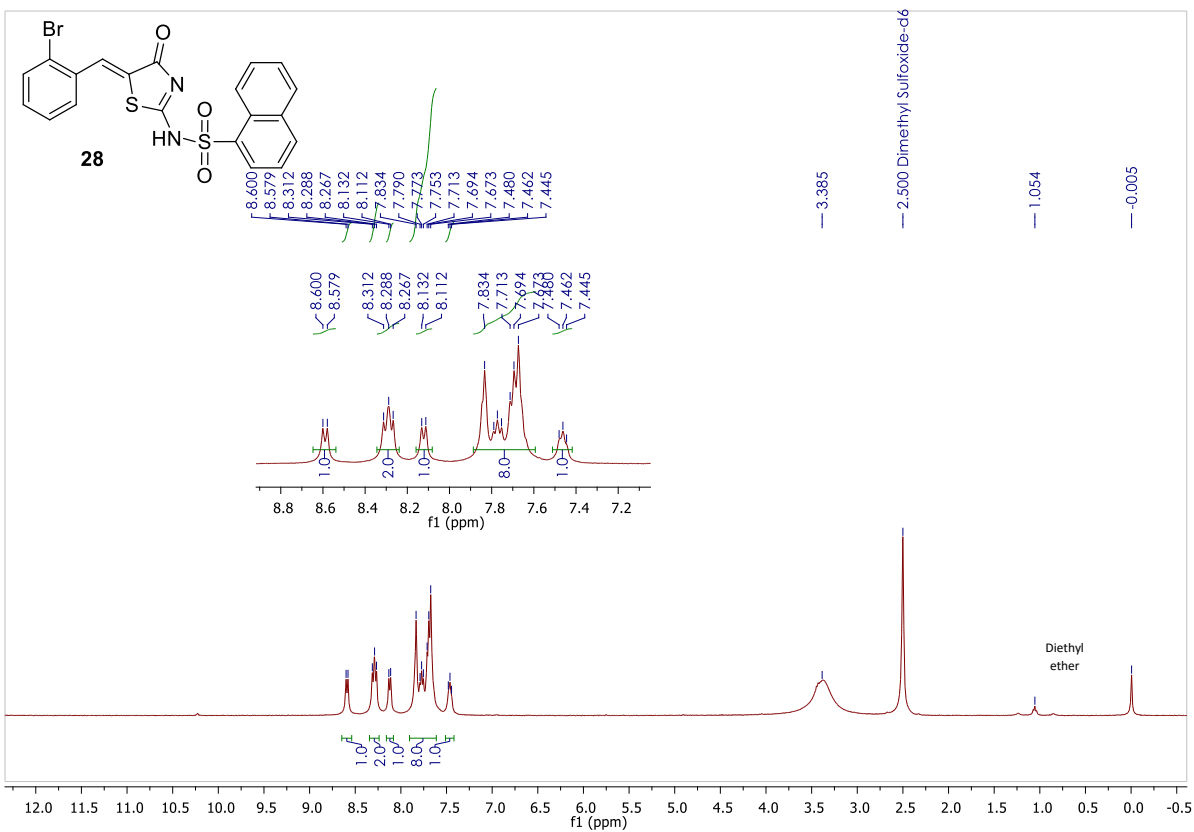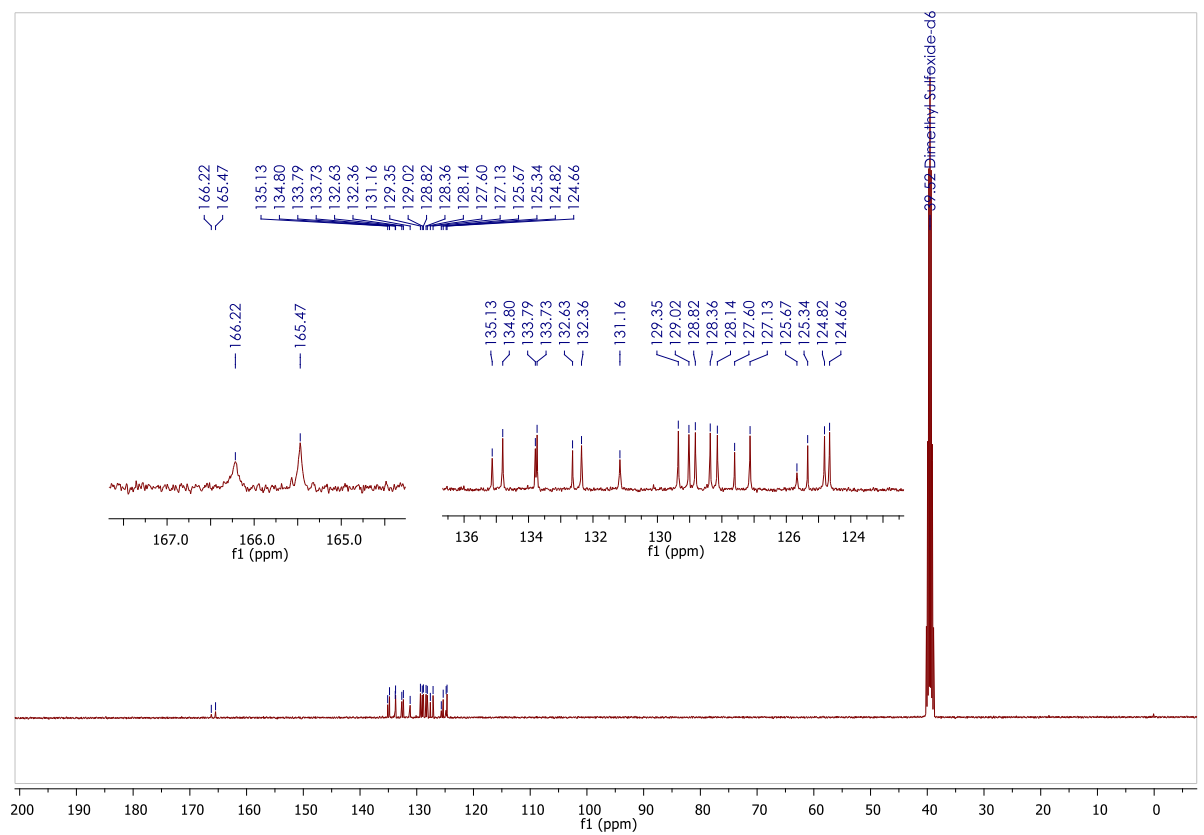



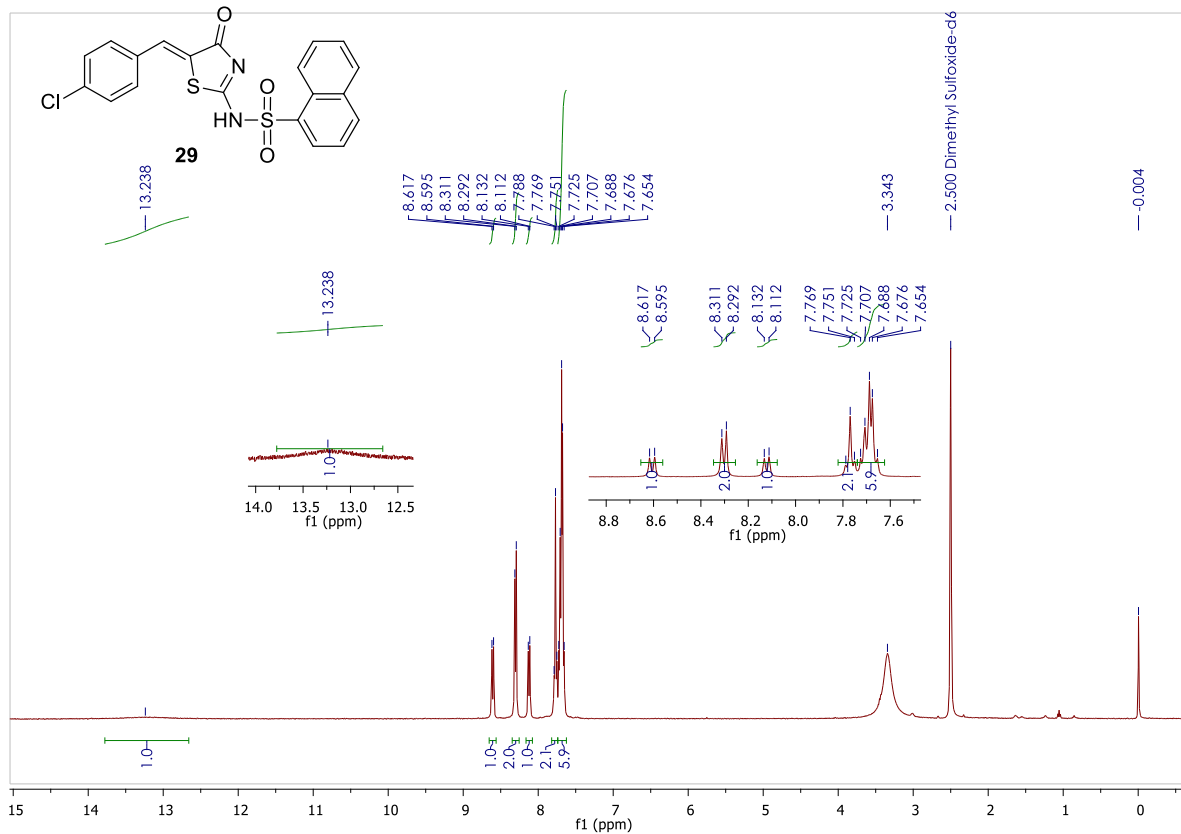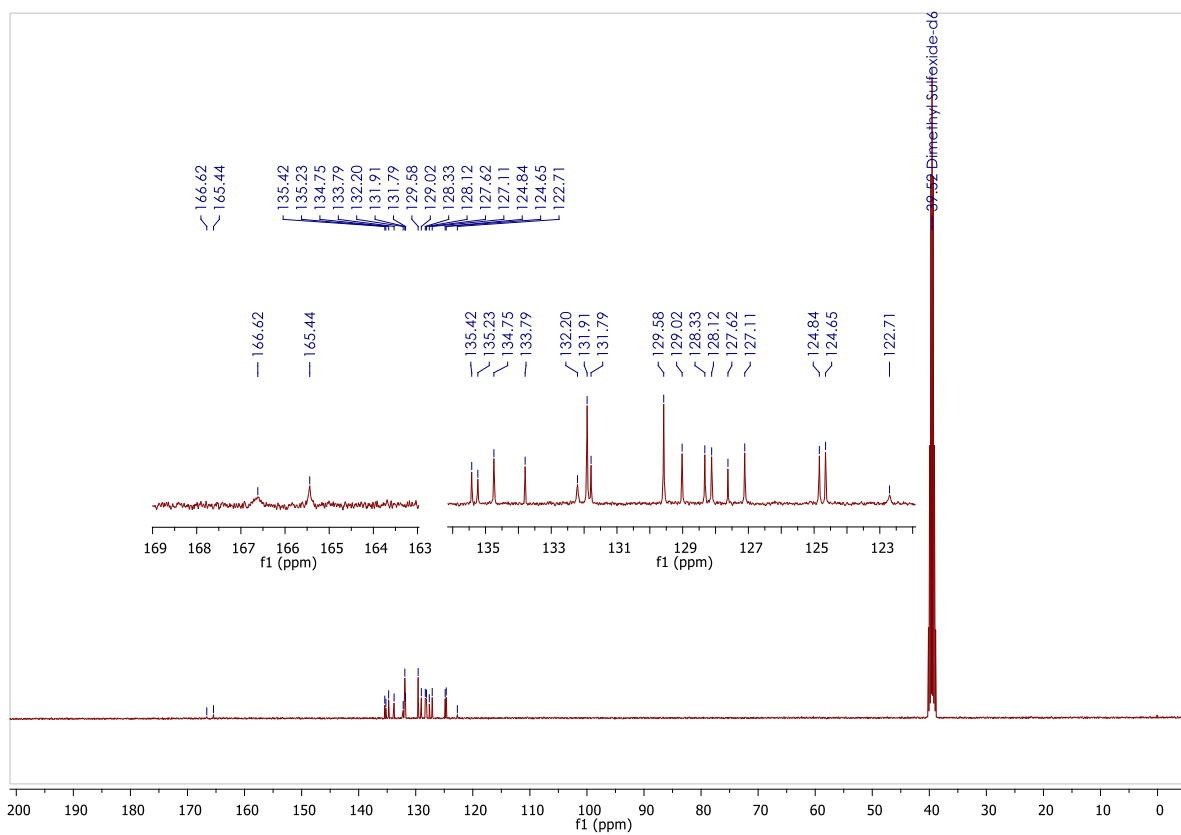

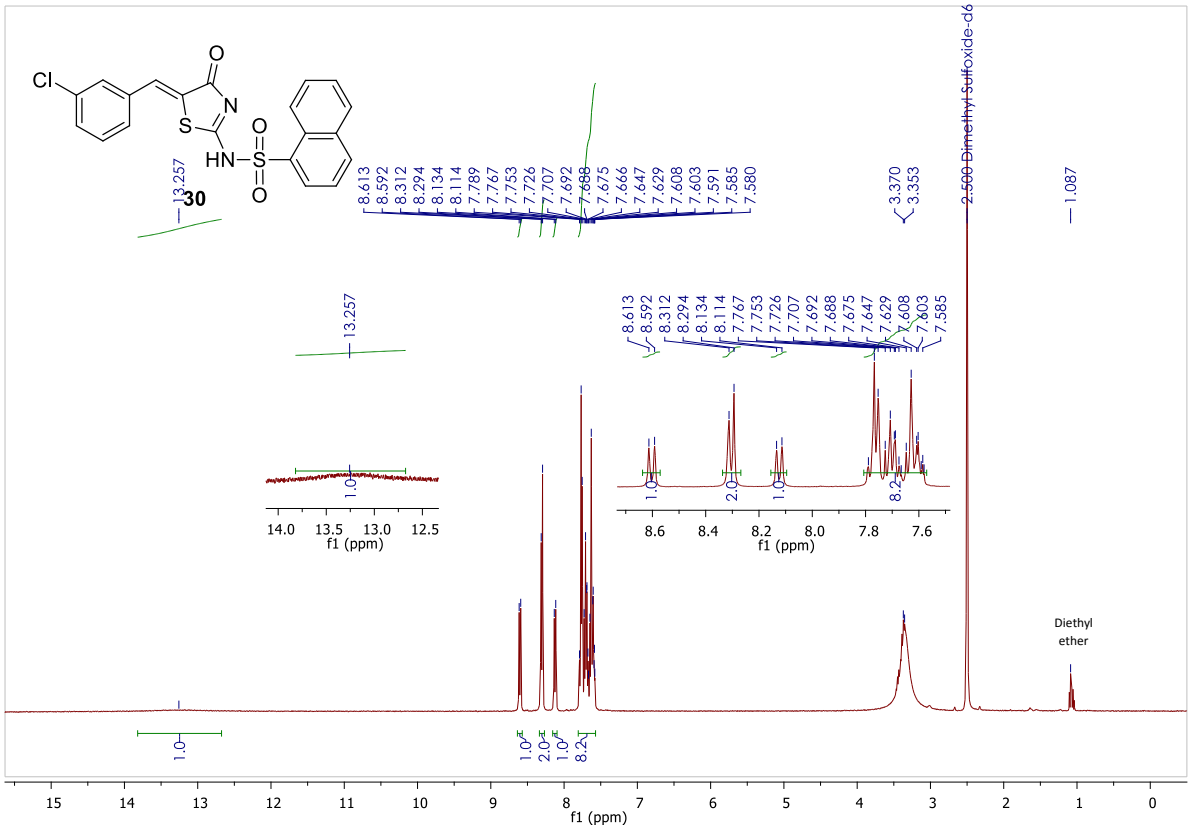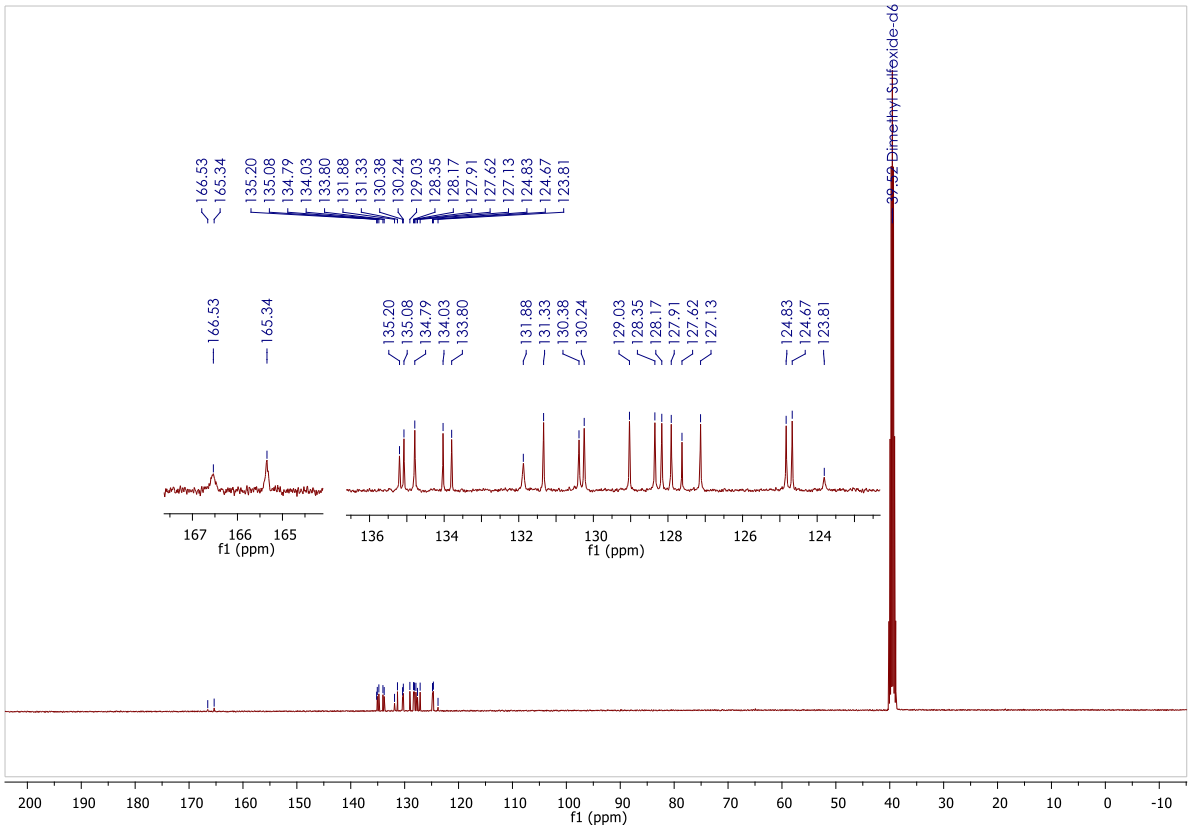

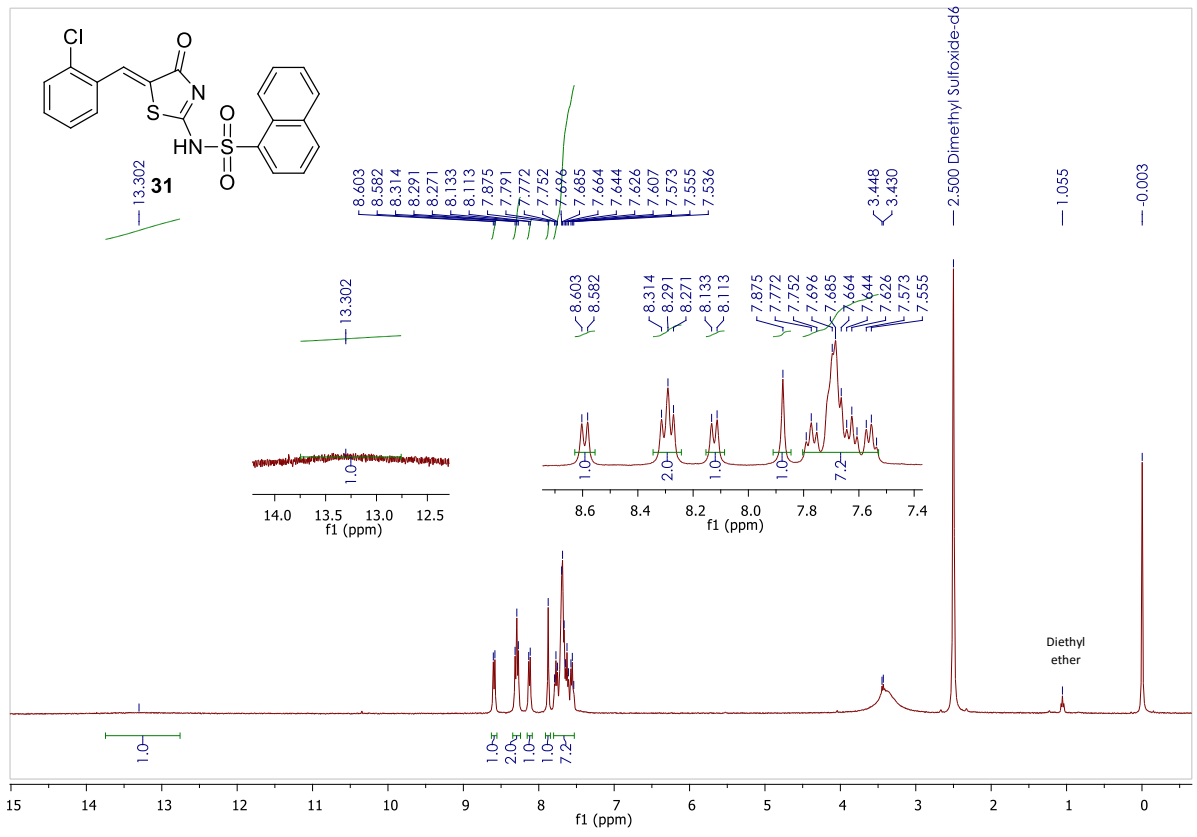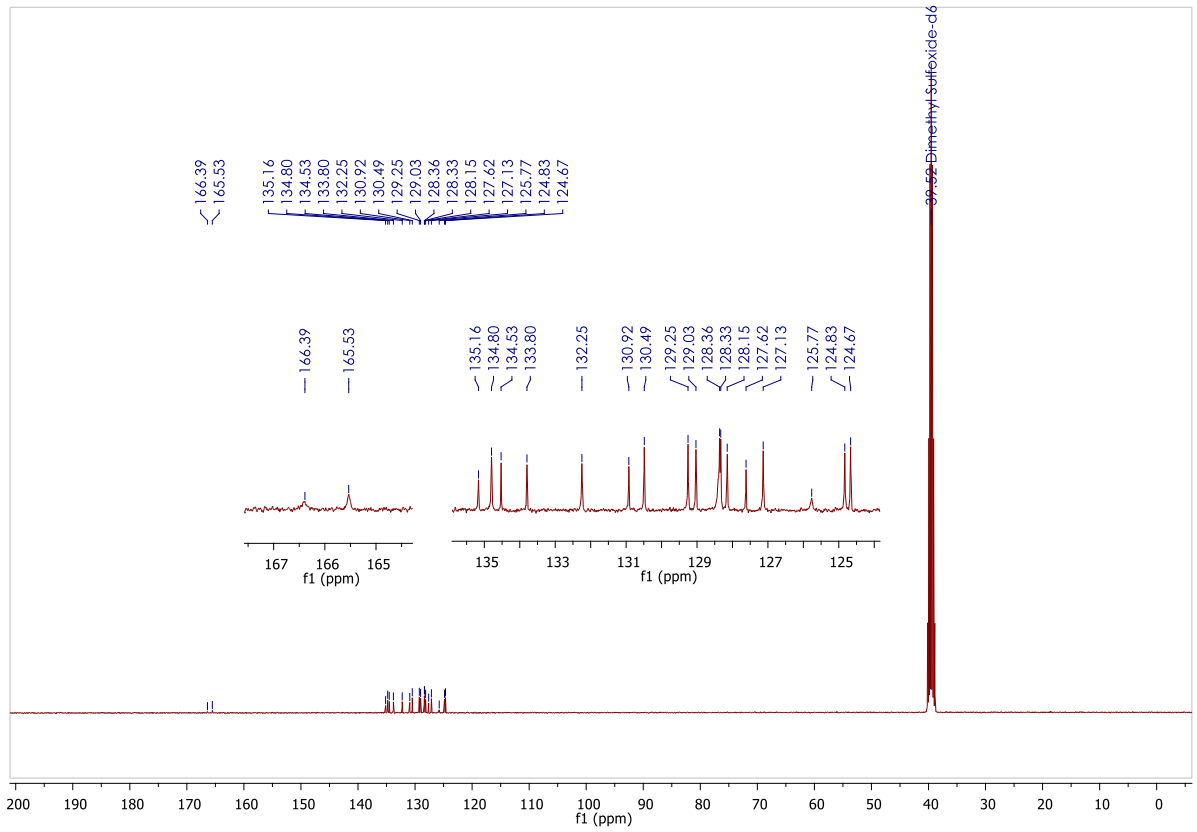

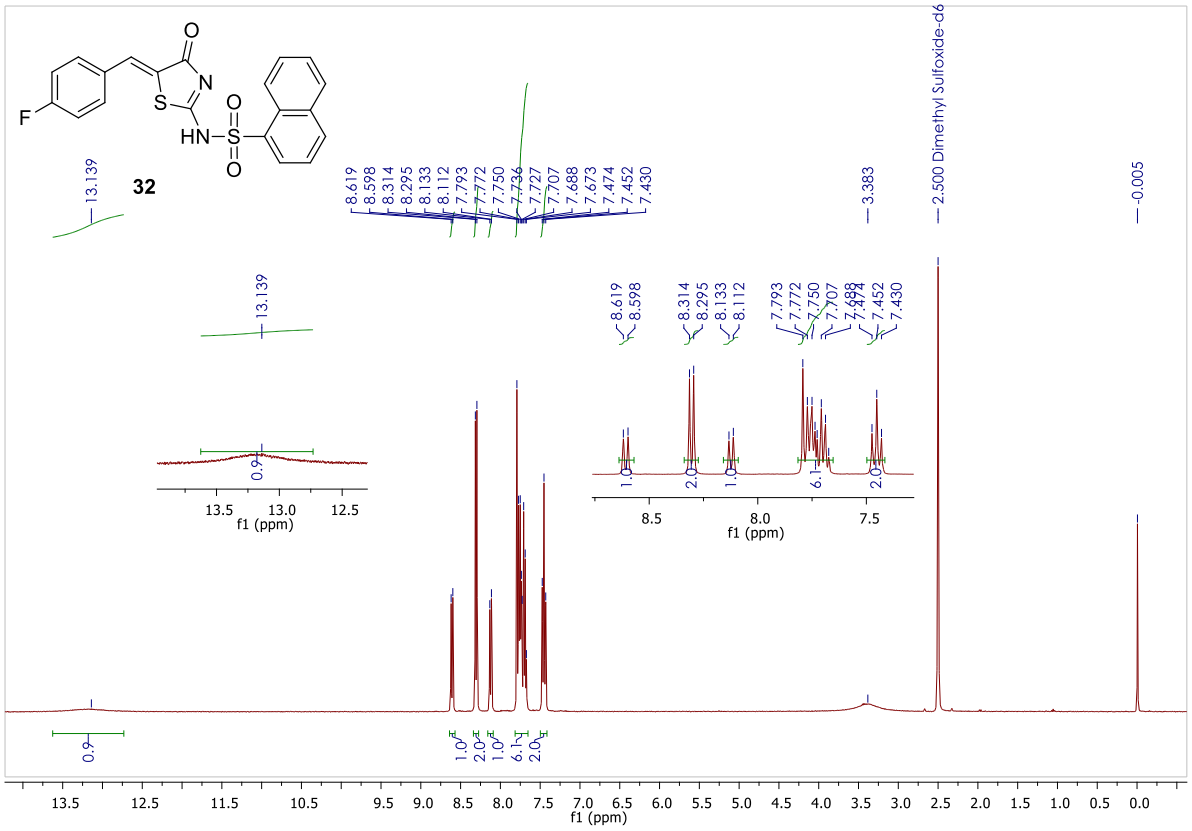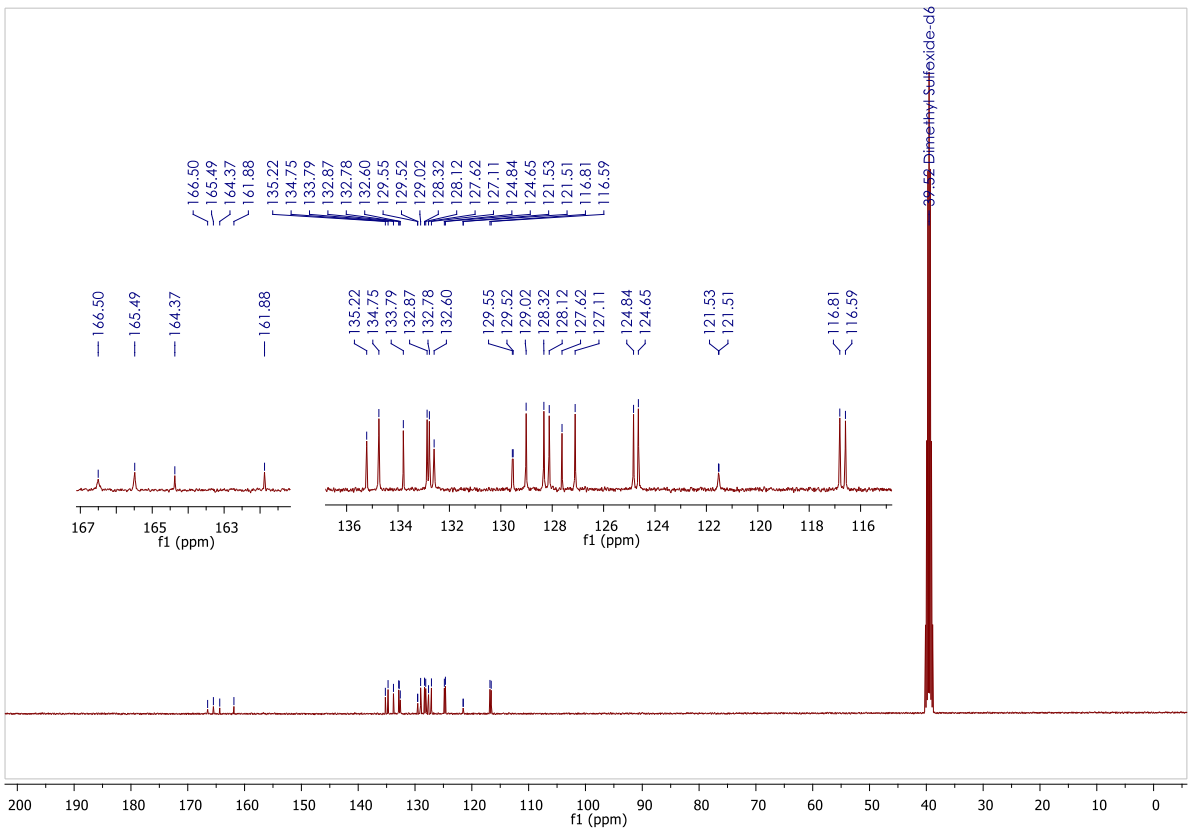

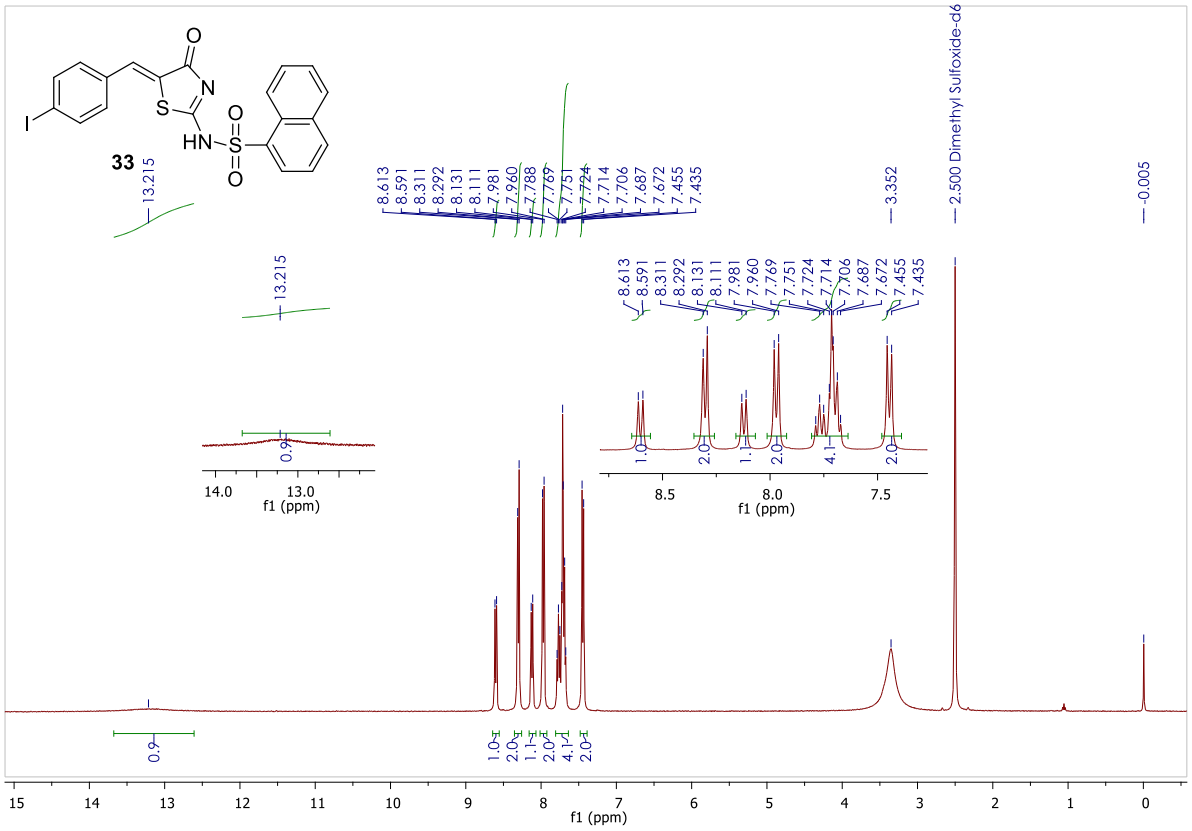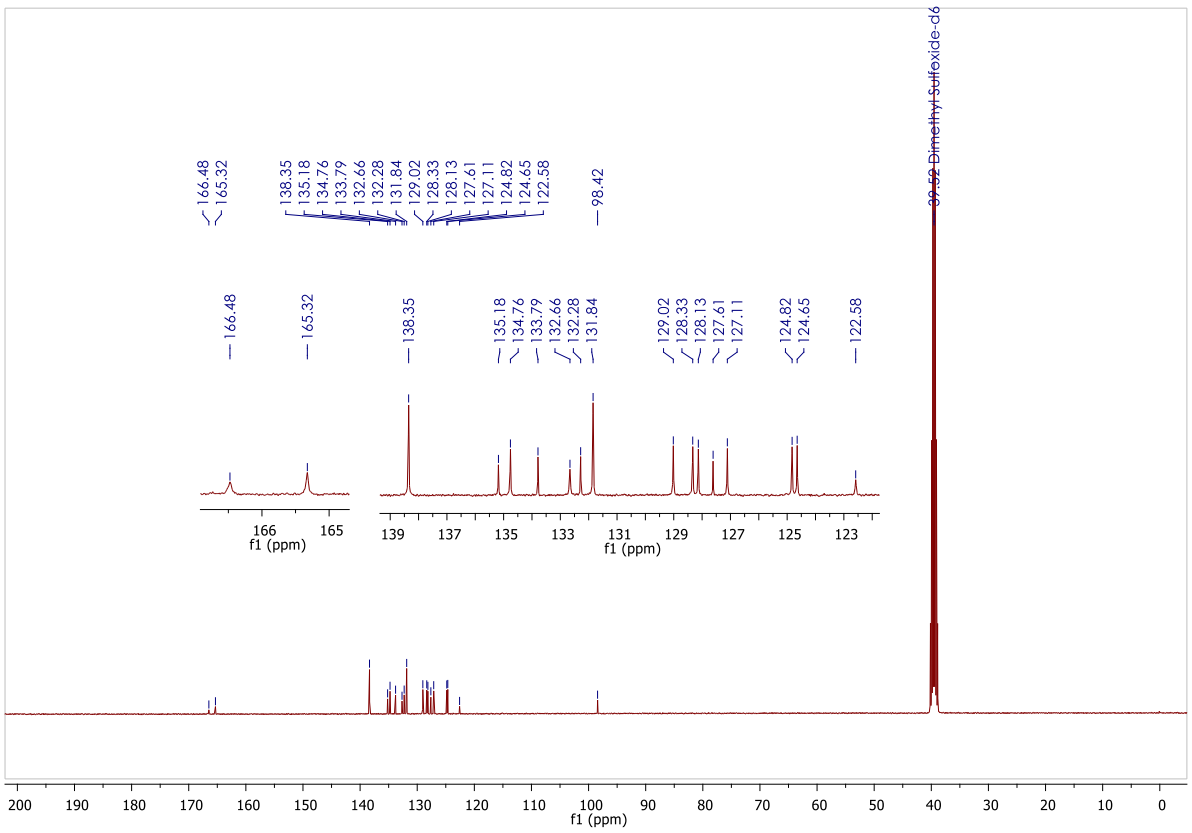

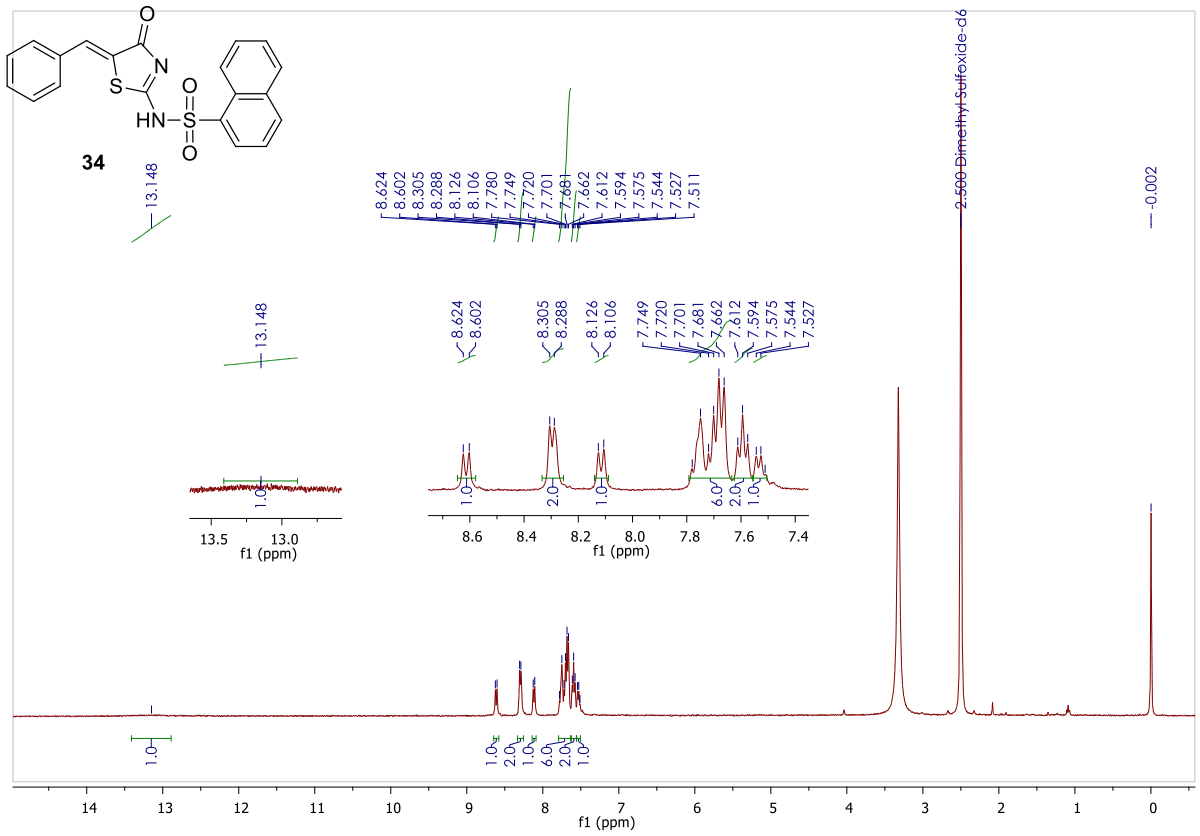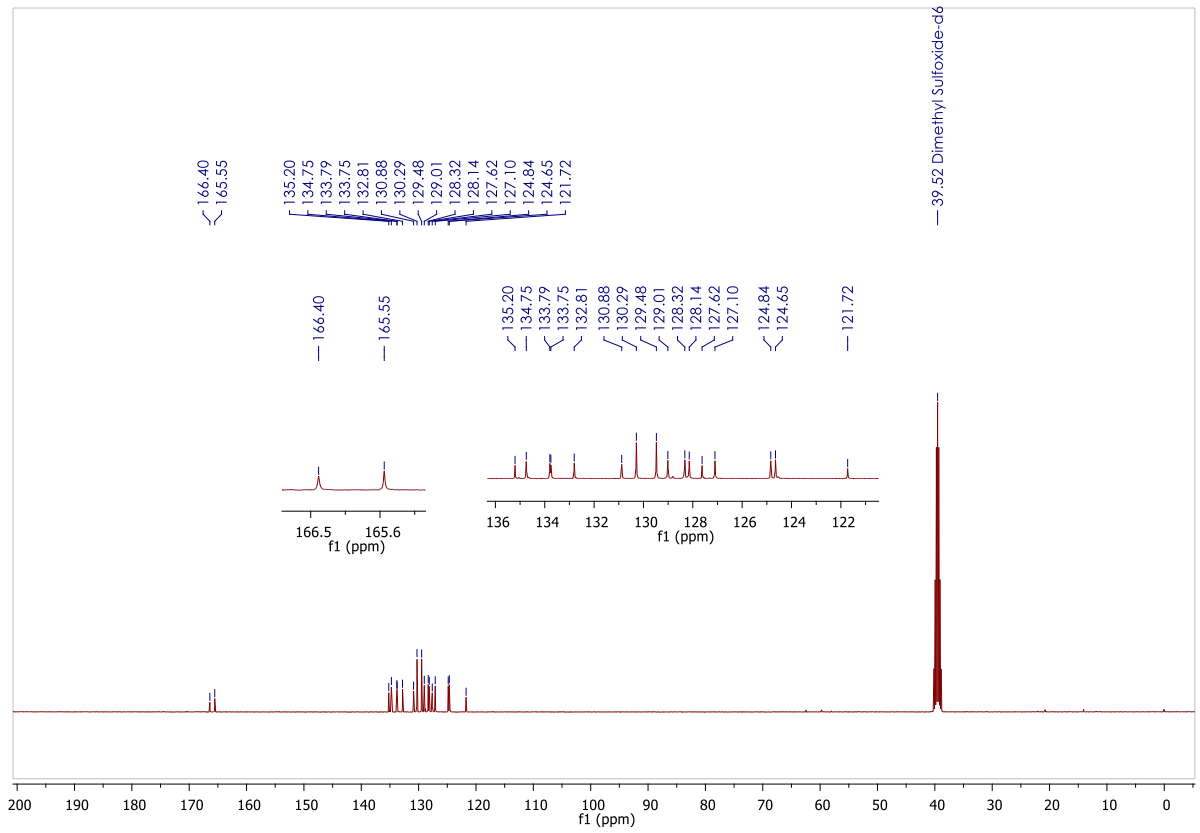

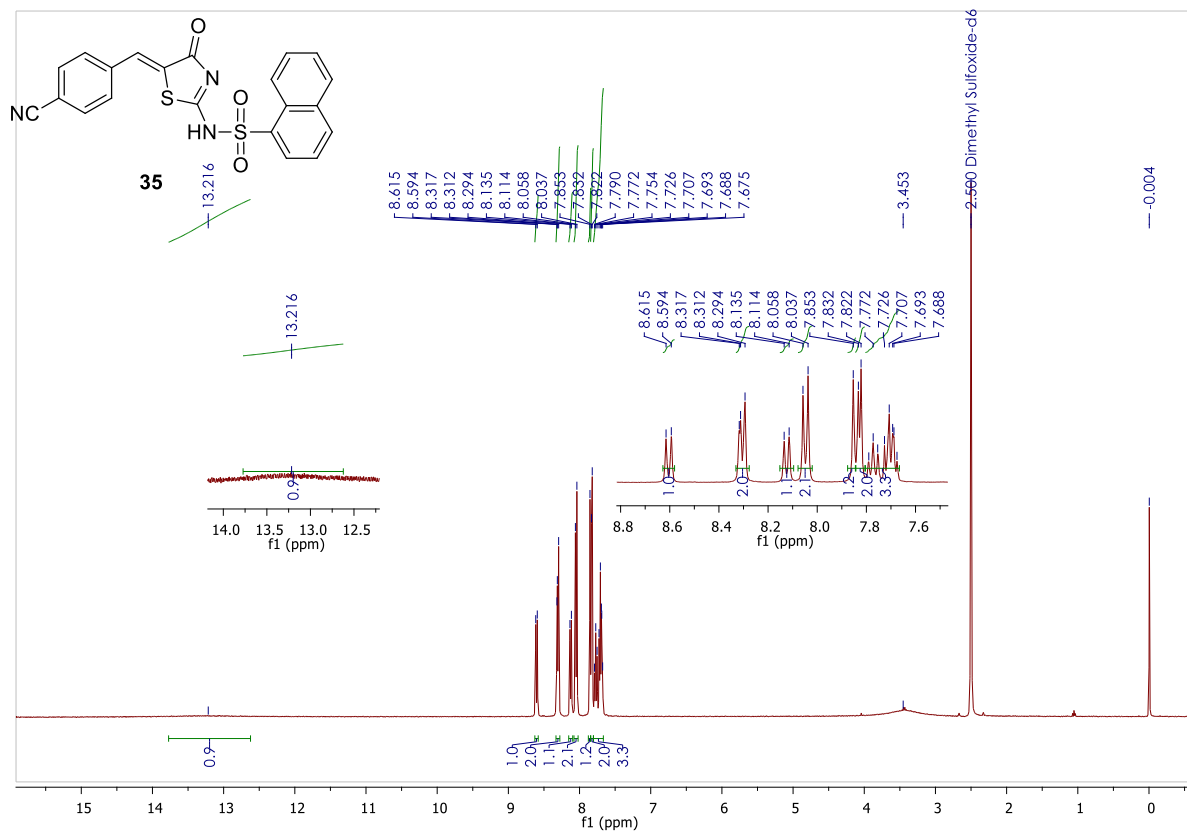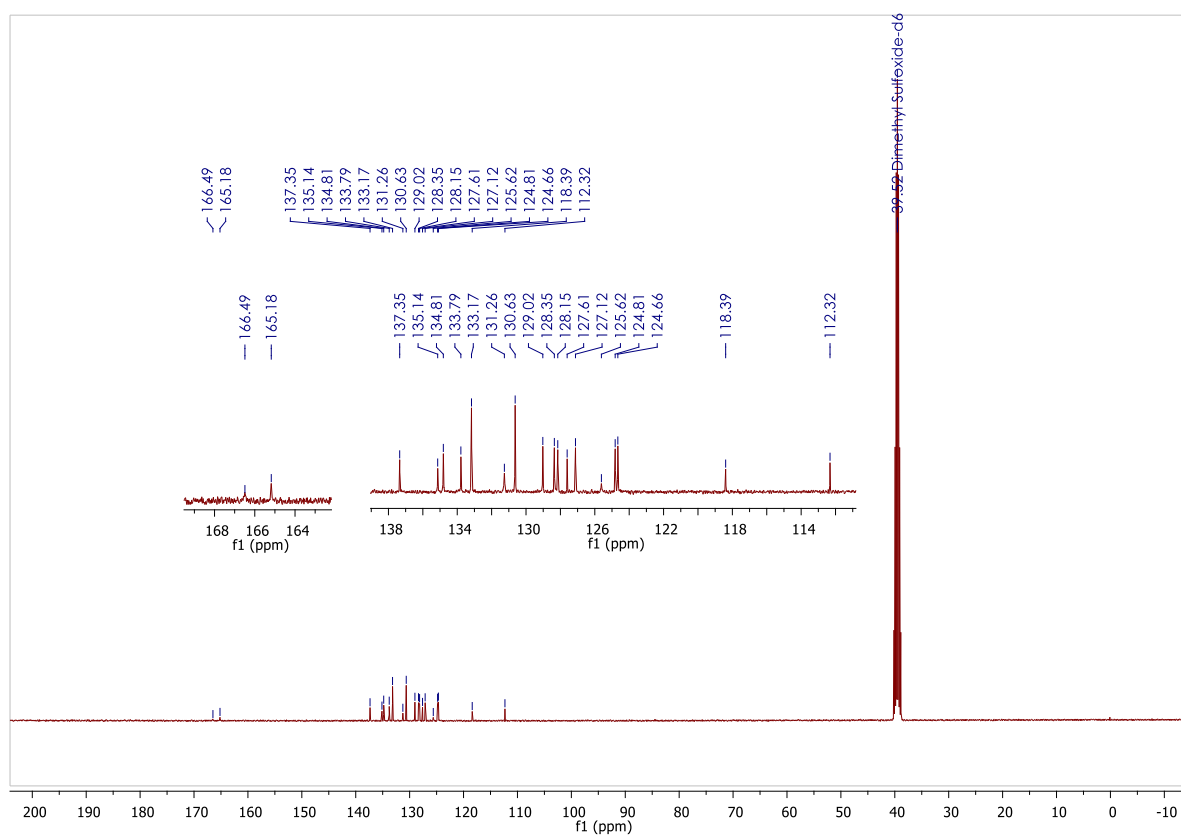

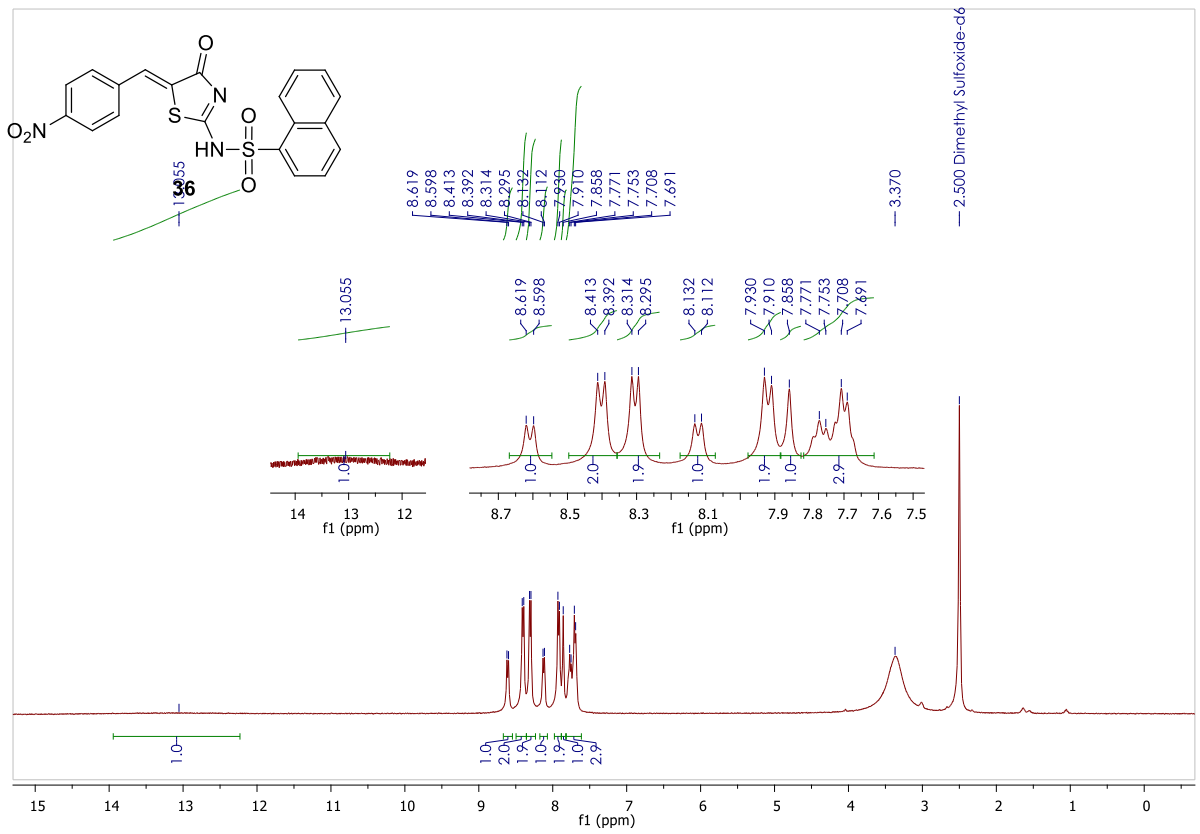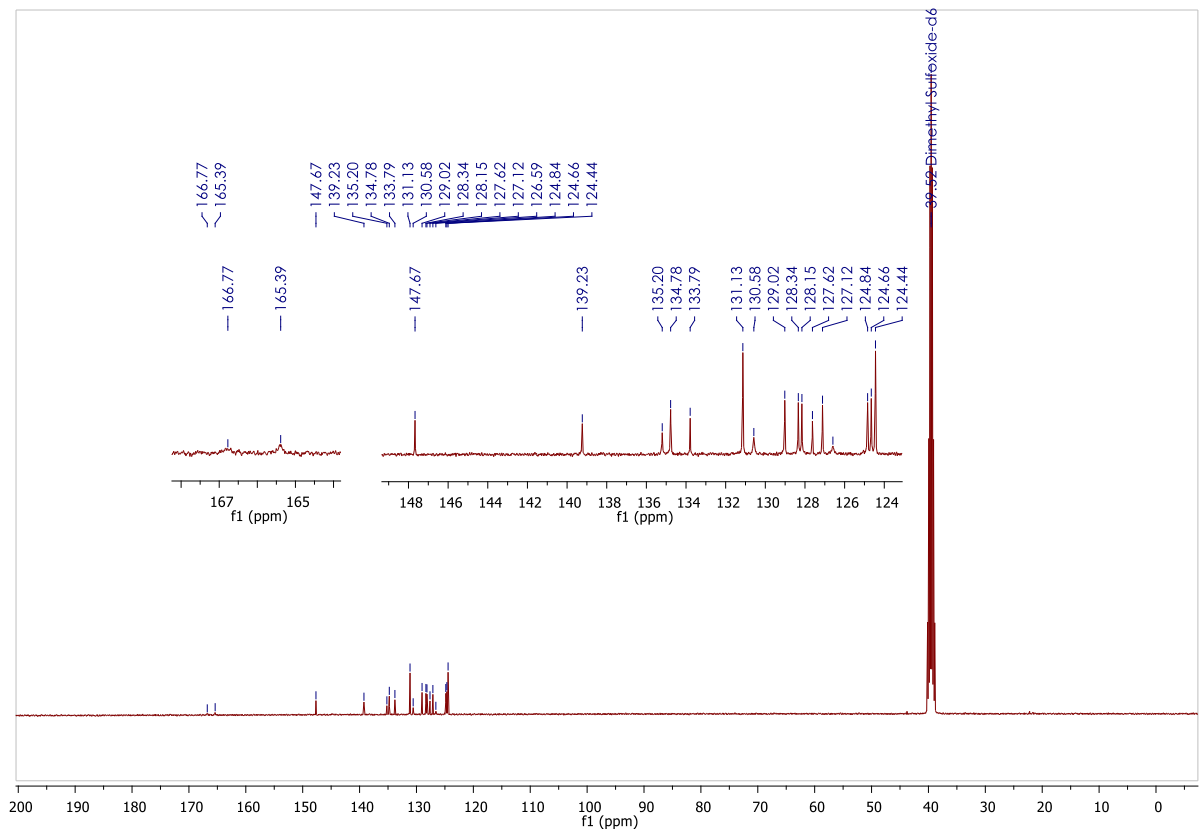



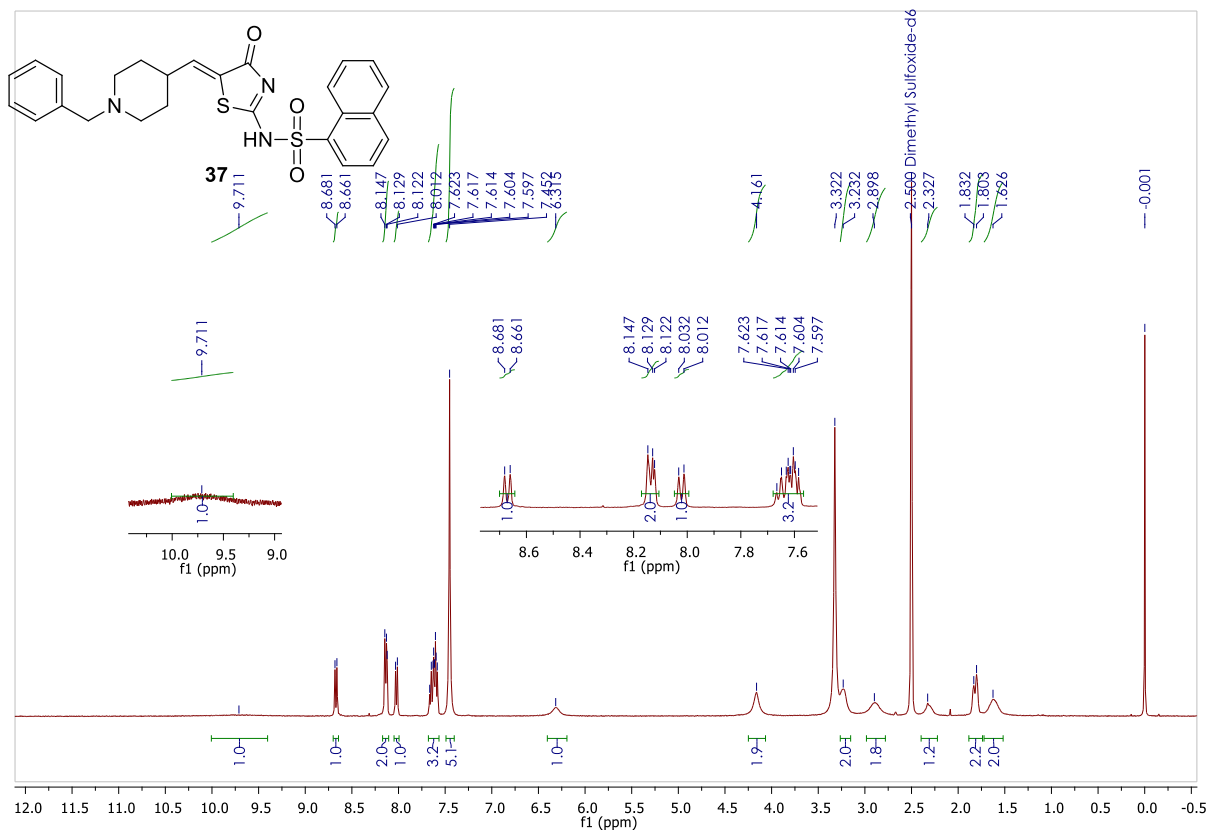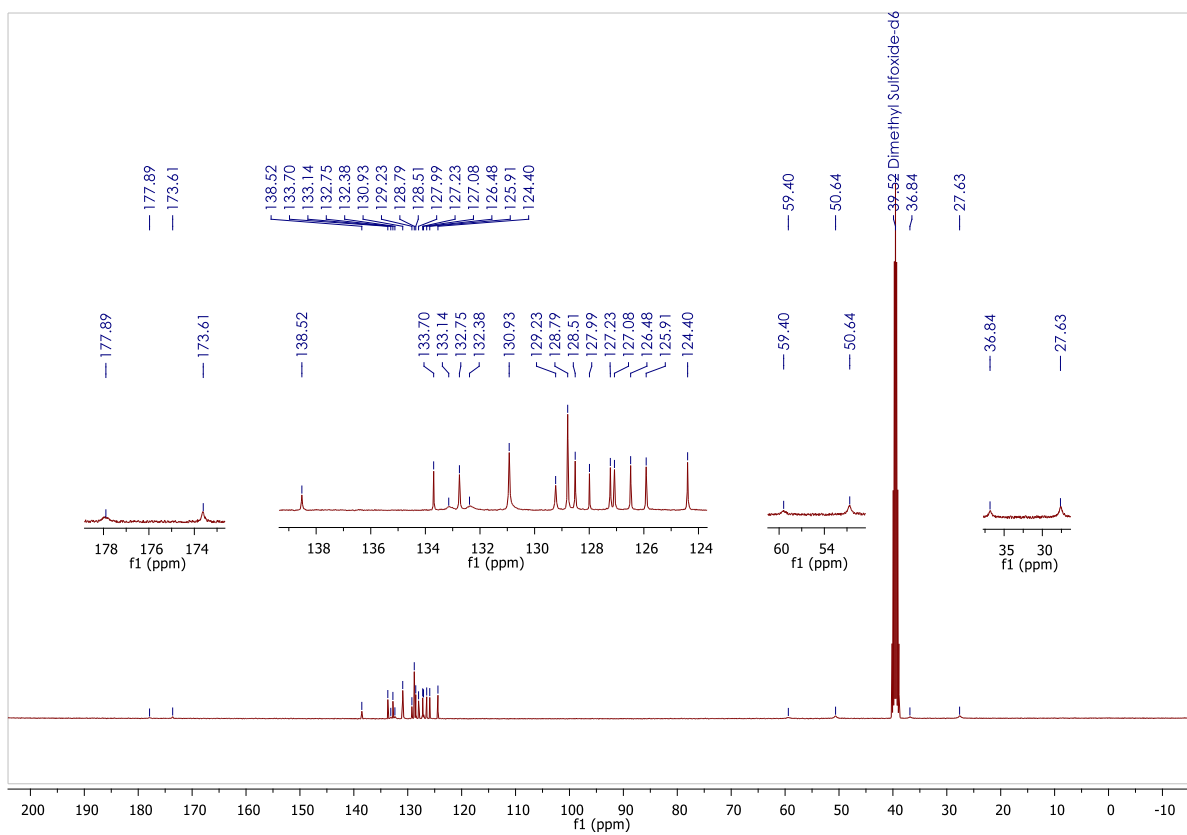

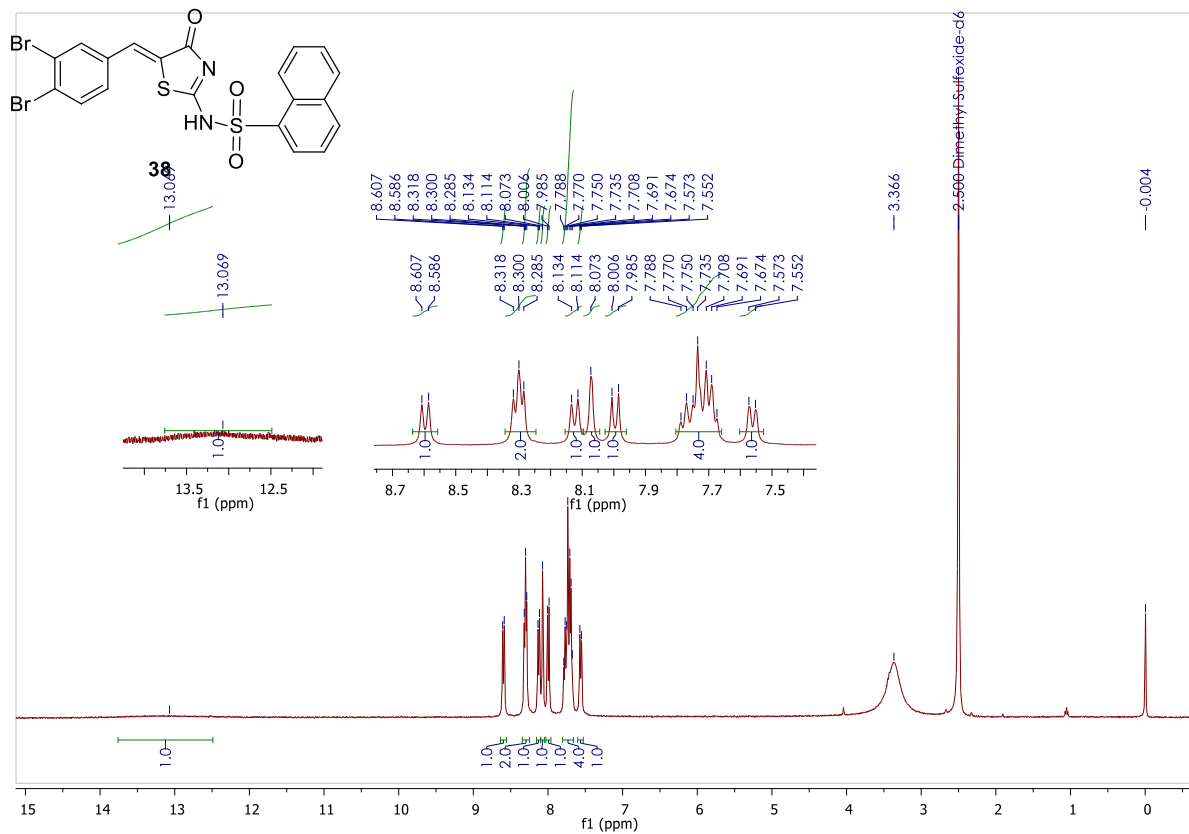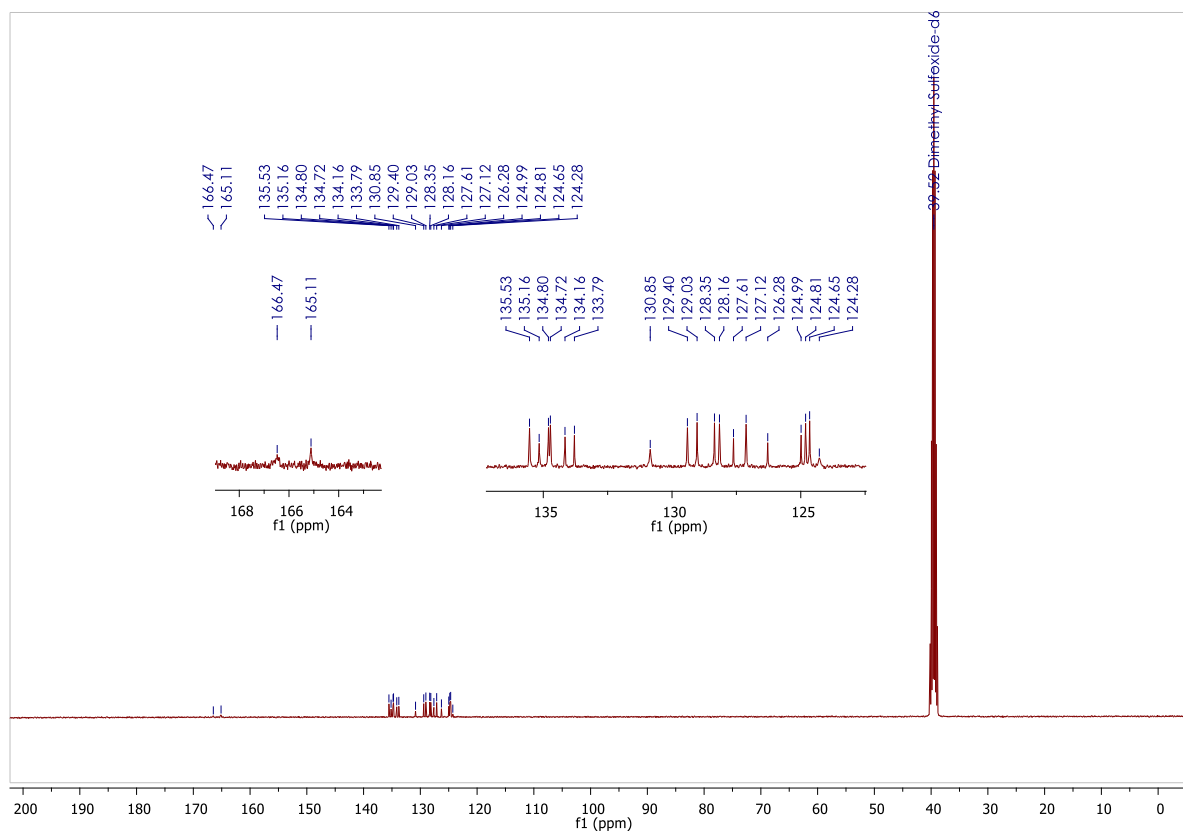

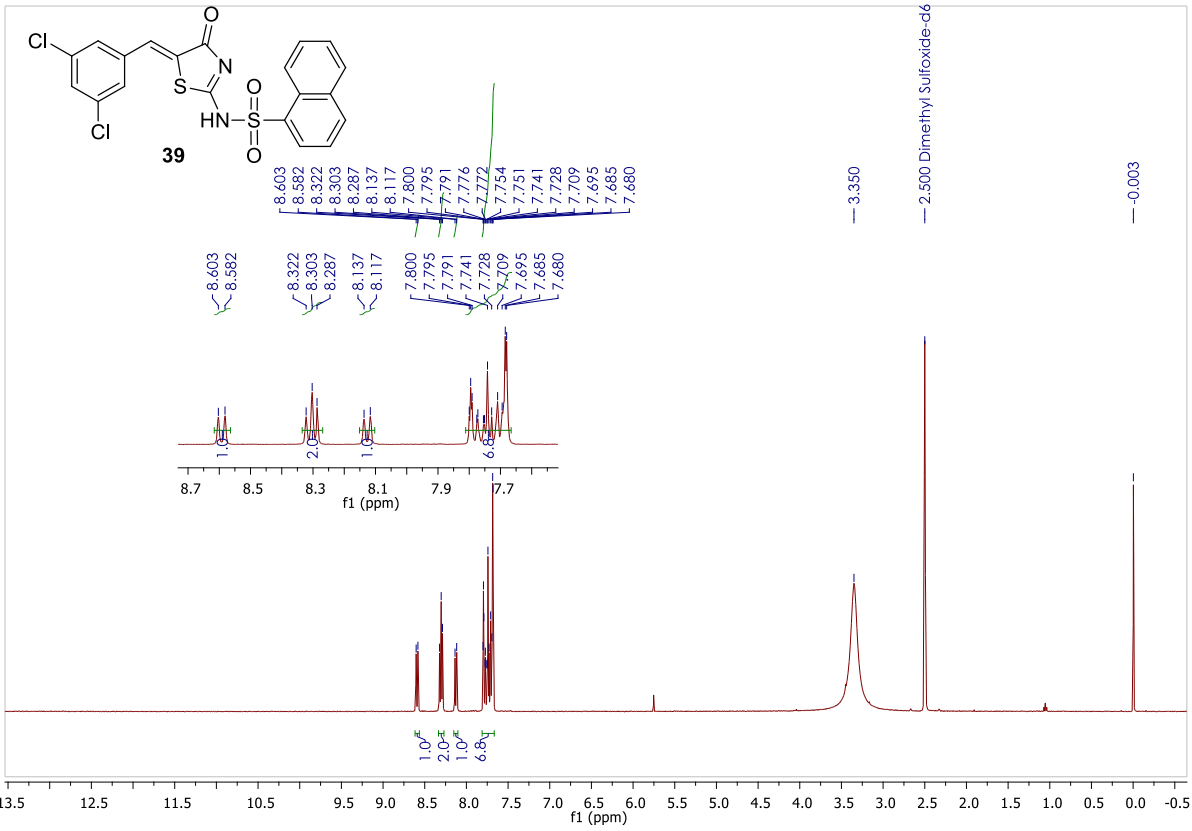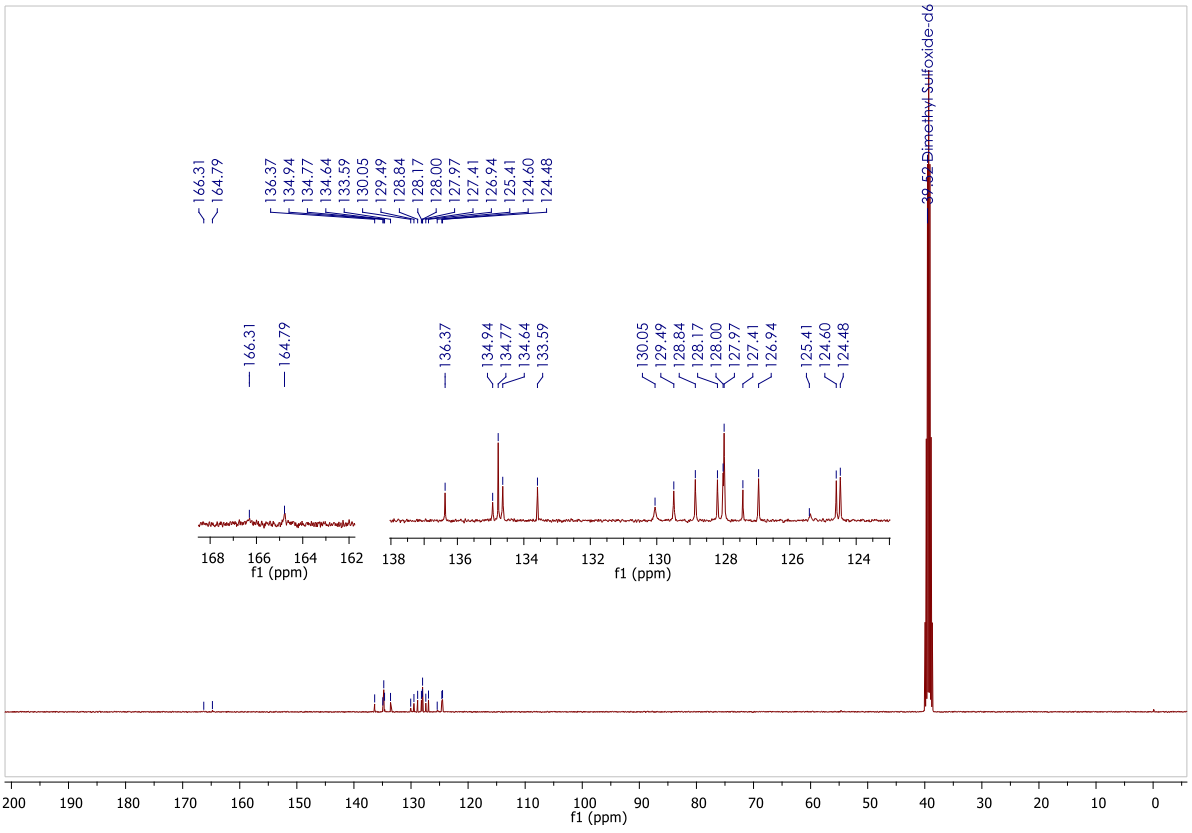

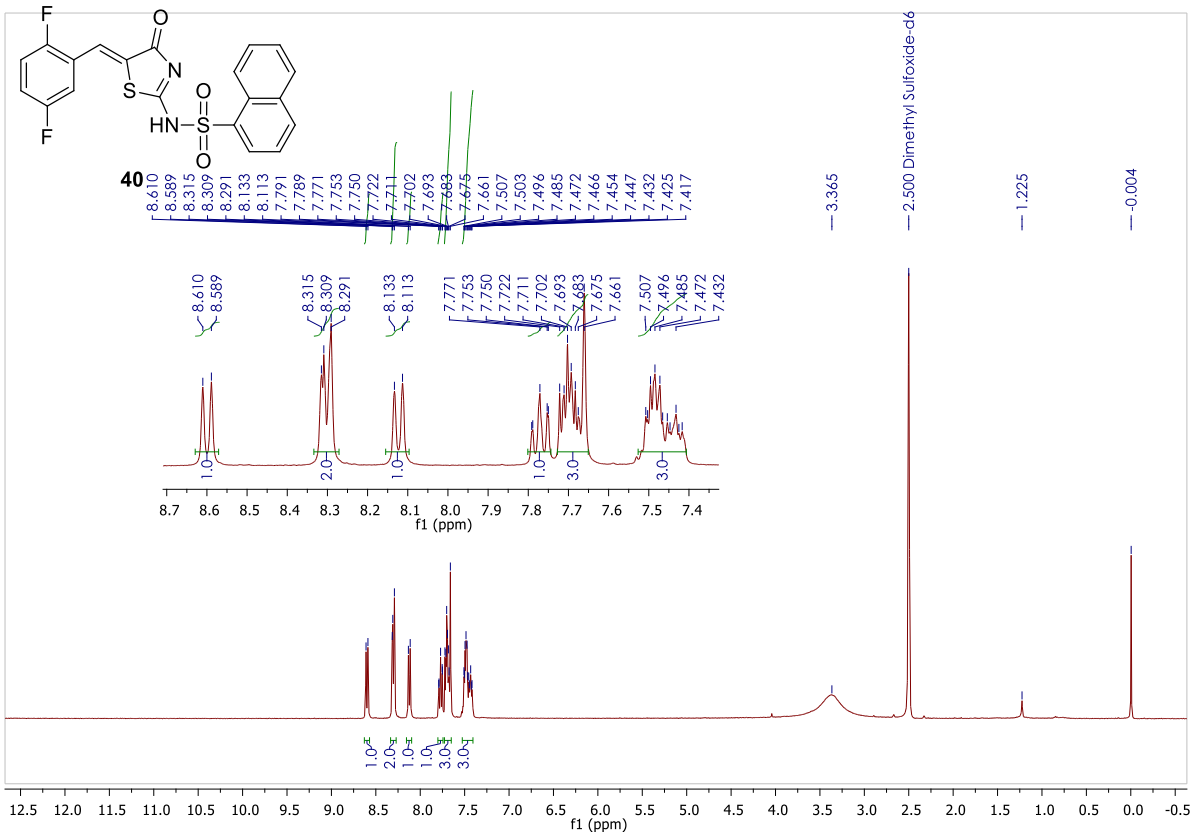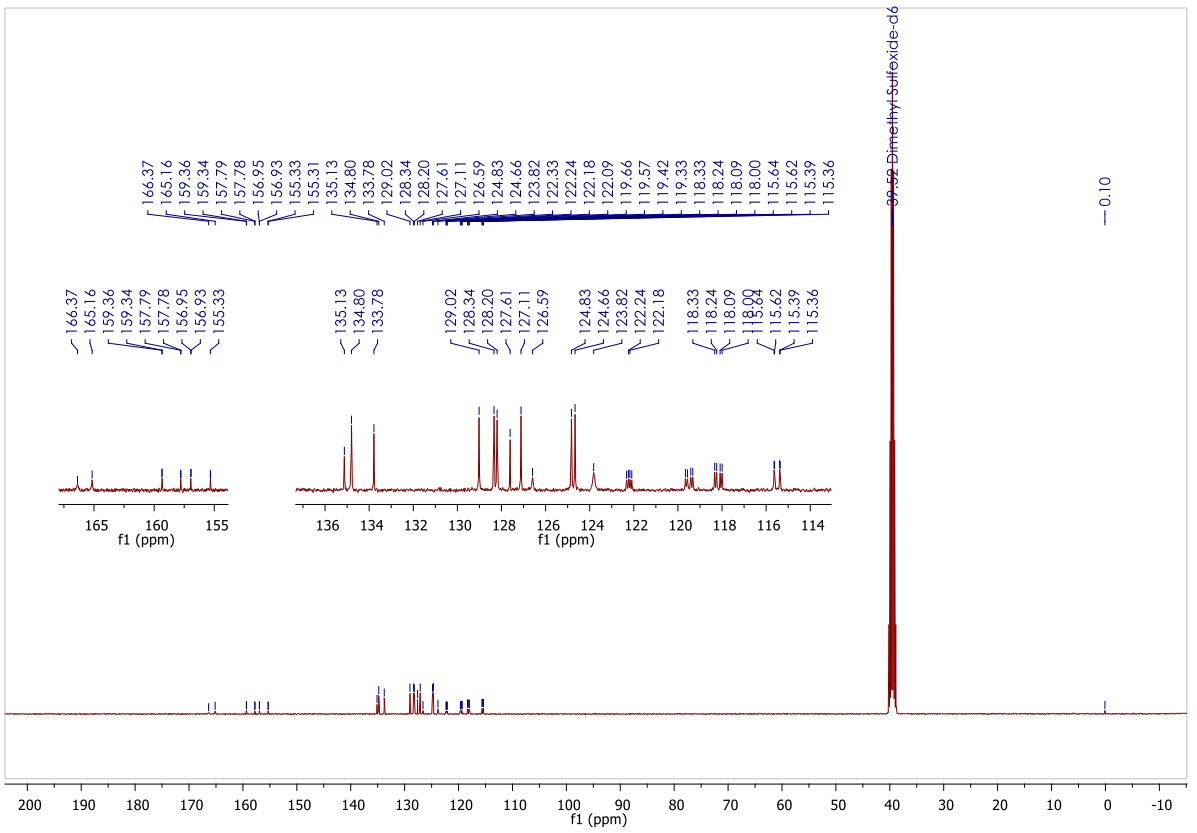

Supplement: c6ob02308h1.pdf [file c6ob02308h1.pdf]
